# Supplementary material for: An attempt to consider cooperativity in helical-sense preferences induced in fused macrocycles
Source: Royal Society of Chemistry journal article supplement (doi:10.1039/d3ob00171g), 2023-01-01
Supplement: d3ob00171g1.pdf [file d3ob00171g1.pdf]

## Supplementary Information

### An attempt to consider cooperativity in helical-sense preferences induced in fused macrocycles

Ryo Katoono,\* Takaaki Kudo and Shunsuke Kawai

*Department of Chemistry, Faculty of Science, Hokkaido University*

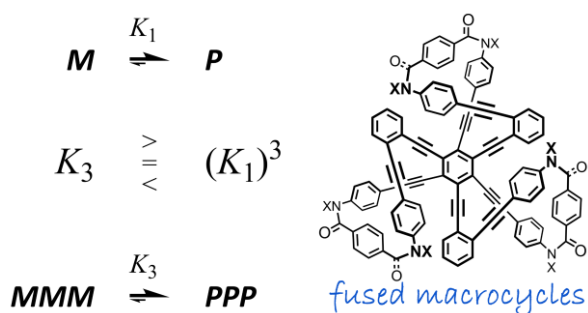

#### Contents

|                                                                              |         |
|------------------------------------------------------------------------------|---------|
| Supplementary Figures ( <b>Figures S1-S7</b> )                               | S2-S11  |
| Experimental                                                                 | S12-S16 |
| Note and references                                                          | S16     |
| Copies of the $^1\text{H}/^{13}\text{C}$ NMR and MS spectra of new compounds | S17-S34 |

## Supplementary Figures

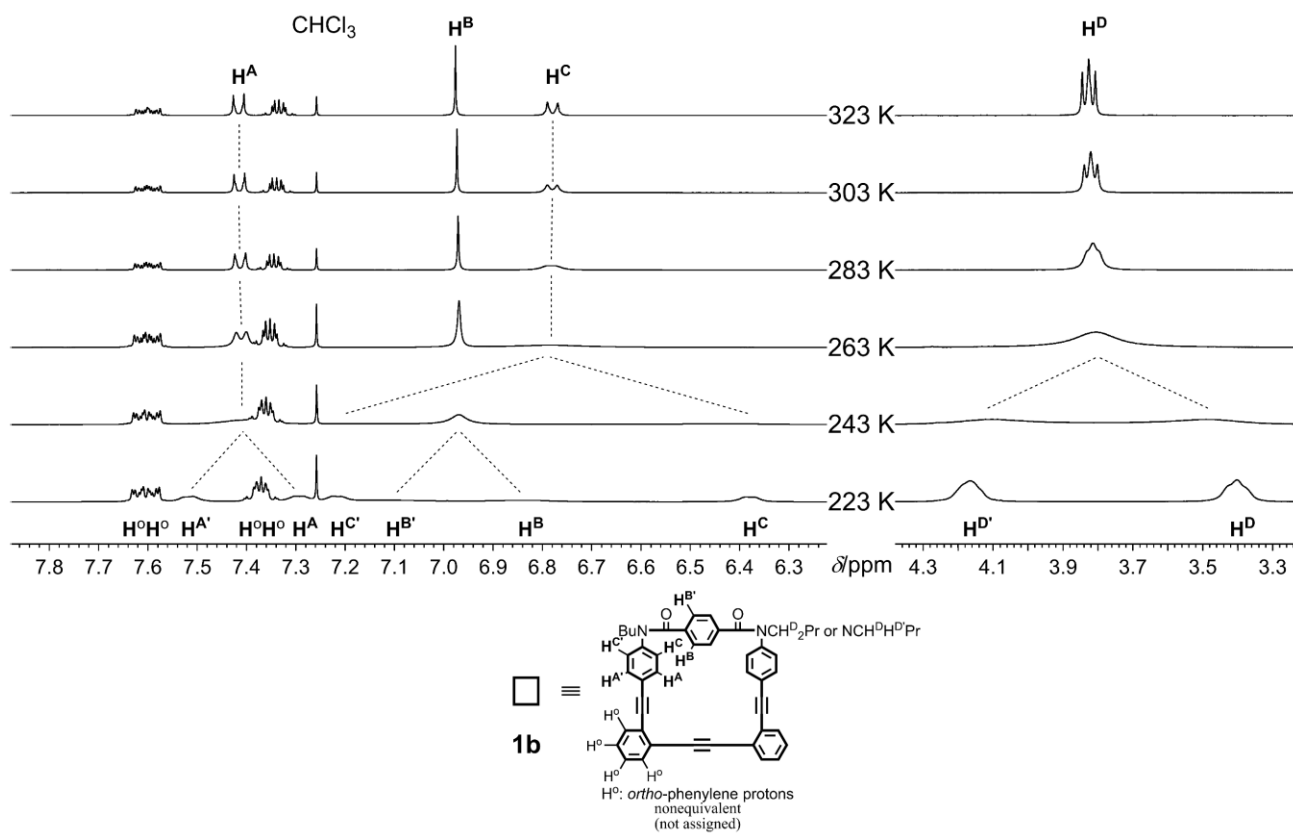

**Fig. S1A** Partial VT-<sup>1</sup>H NMR spectra (400 MHz; left: aromatic protons and right: methylene protons) of **1b**,<sup>1</sup> measured in chloroform-*d* at 223-323 K.

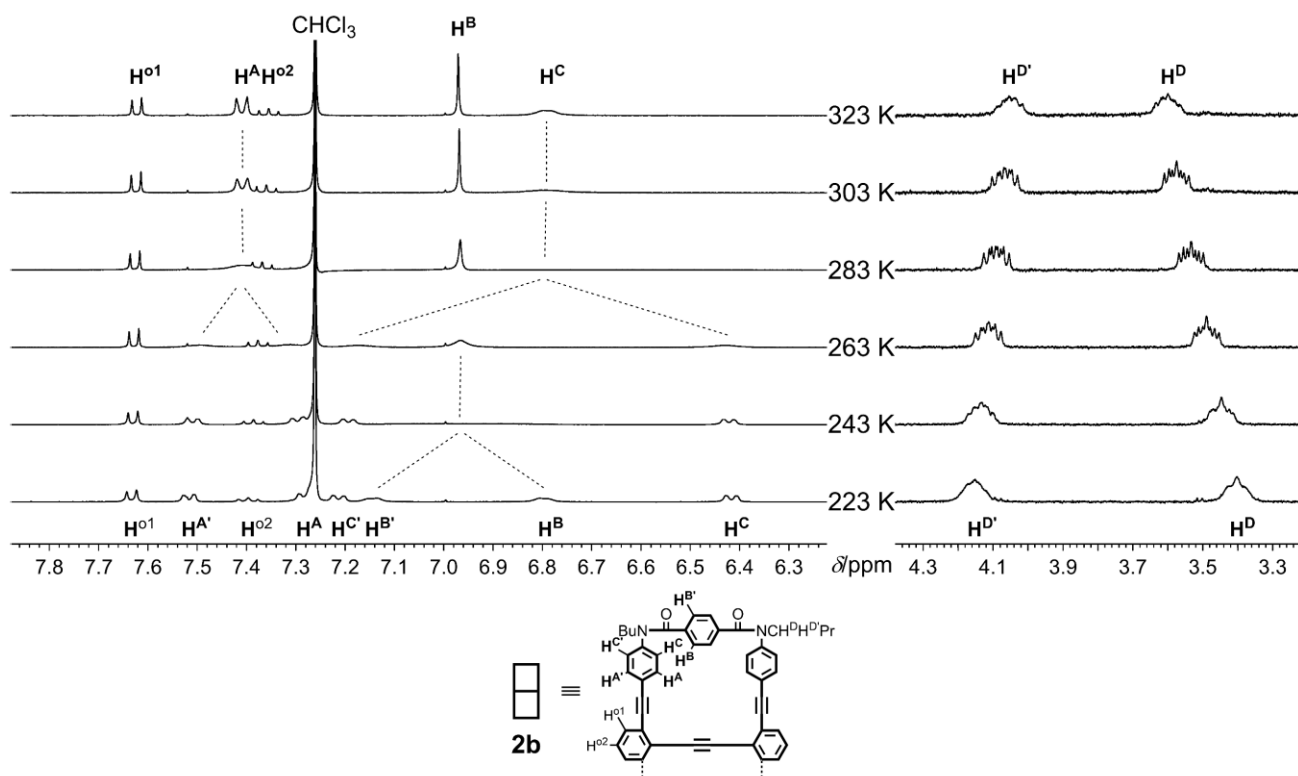

**Fig. S1B** Partial VT- $^1\text{H}$  NMR spectra (400 MHz; left: aromatic protons and right: methylene protons) of **2b**,<sup>2</sup> measured in chloroform-*d* at 213–313 K.

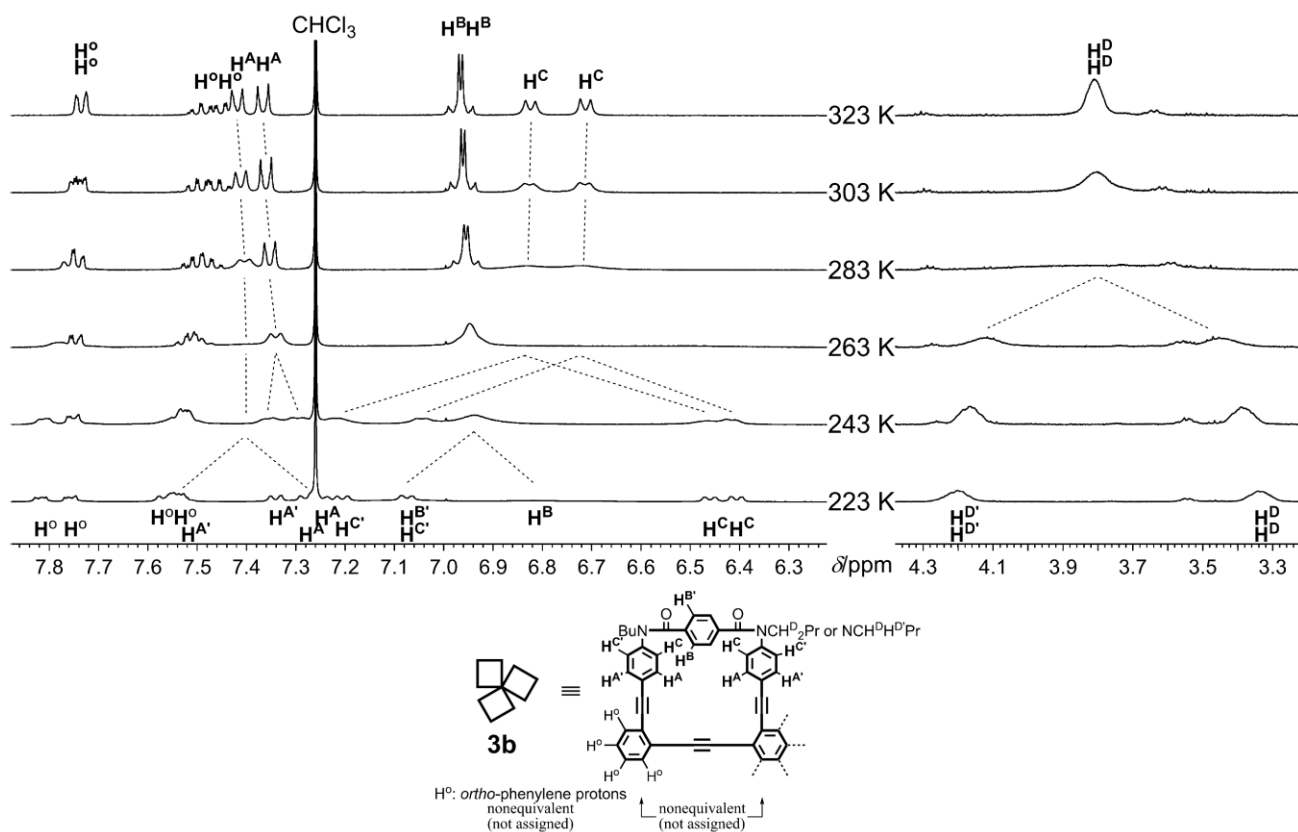

**Fig. S1C** Partial VT- $^1\text{H}$  NMR spectra (400 MHz; left: aromatic protons and right: methylene protons) of **3b**, measured in chloroform-*d* at 223-323 K.

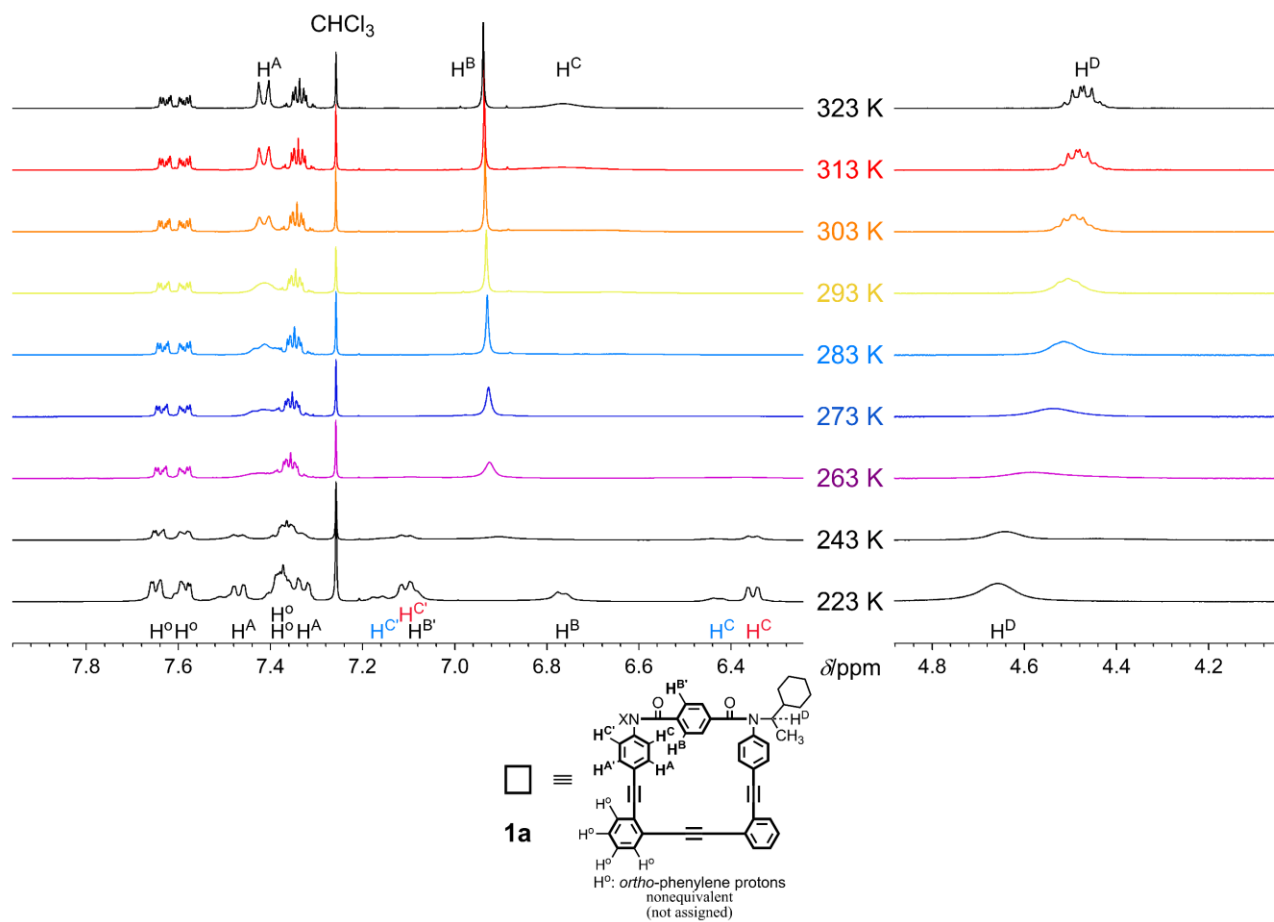

**Fig. S2A** Partial VT-<sup>1</sup>H NMR spectra (400 MHz; left: aromatic protons and right: methine protons) of **1a**,<sup>1</sup> measured in chloroform-*d* at 223-323 K.

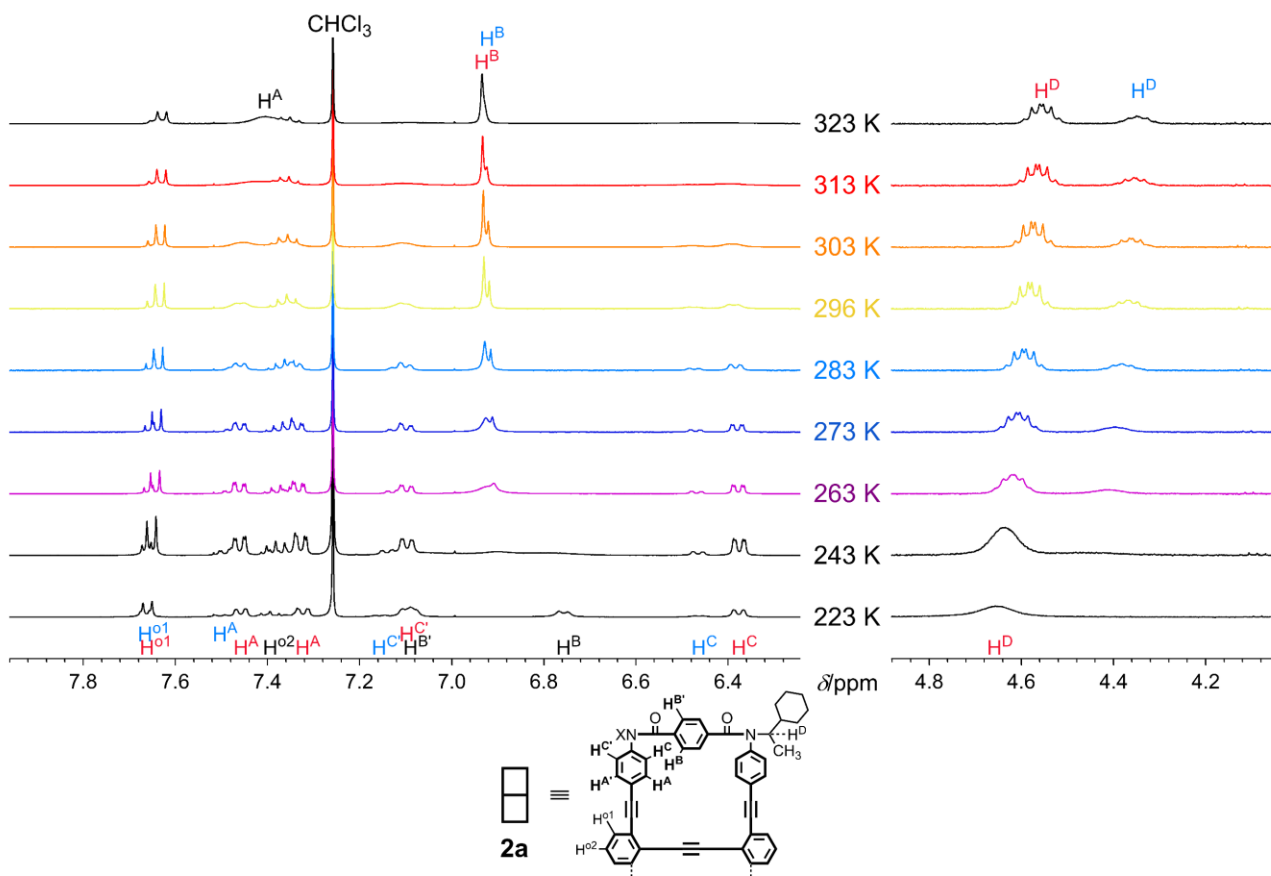

**Fig. S2B** Partial VT-<sup>1</sup>H NMR spectra (400 MHz; left: aromatic protons and right: methine protons) of **2a**,<sup>2</sup> measured in chloroform-*d* at 223–323 K.

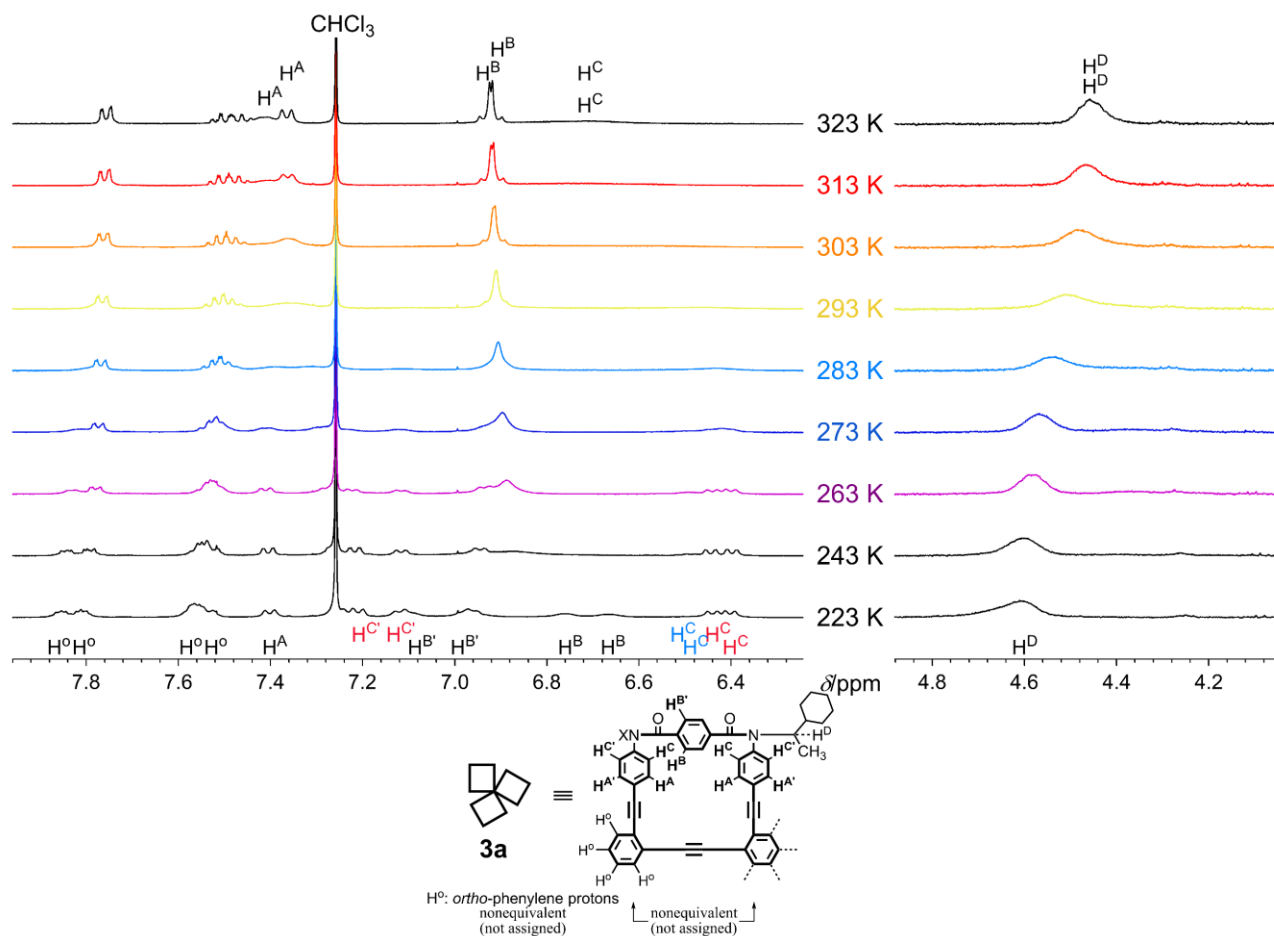

**Fig. S2C** Partial VT-<sup>1</sup>H NMR spectra (400 MHz; left: aromatic protons and right: methine protons) of **3a**, measured in chloroform-*d* at 223-323 K.

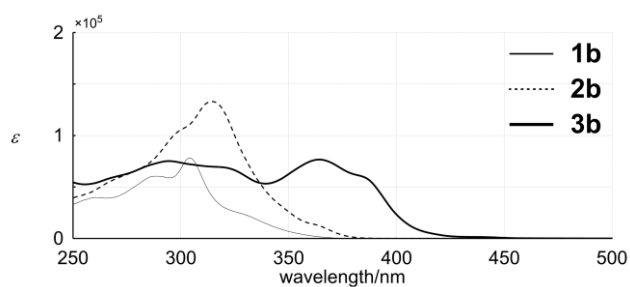

**Fig. S3** UV spectra of **1b**, **2b** and **3b**, measured in dichloromethane at room temperature.

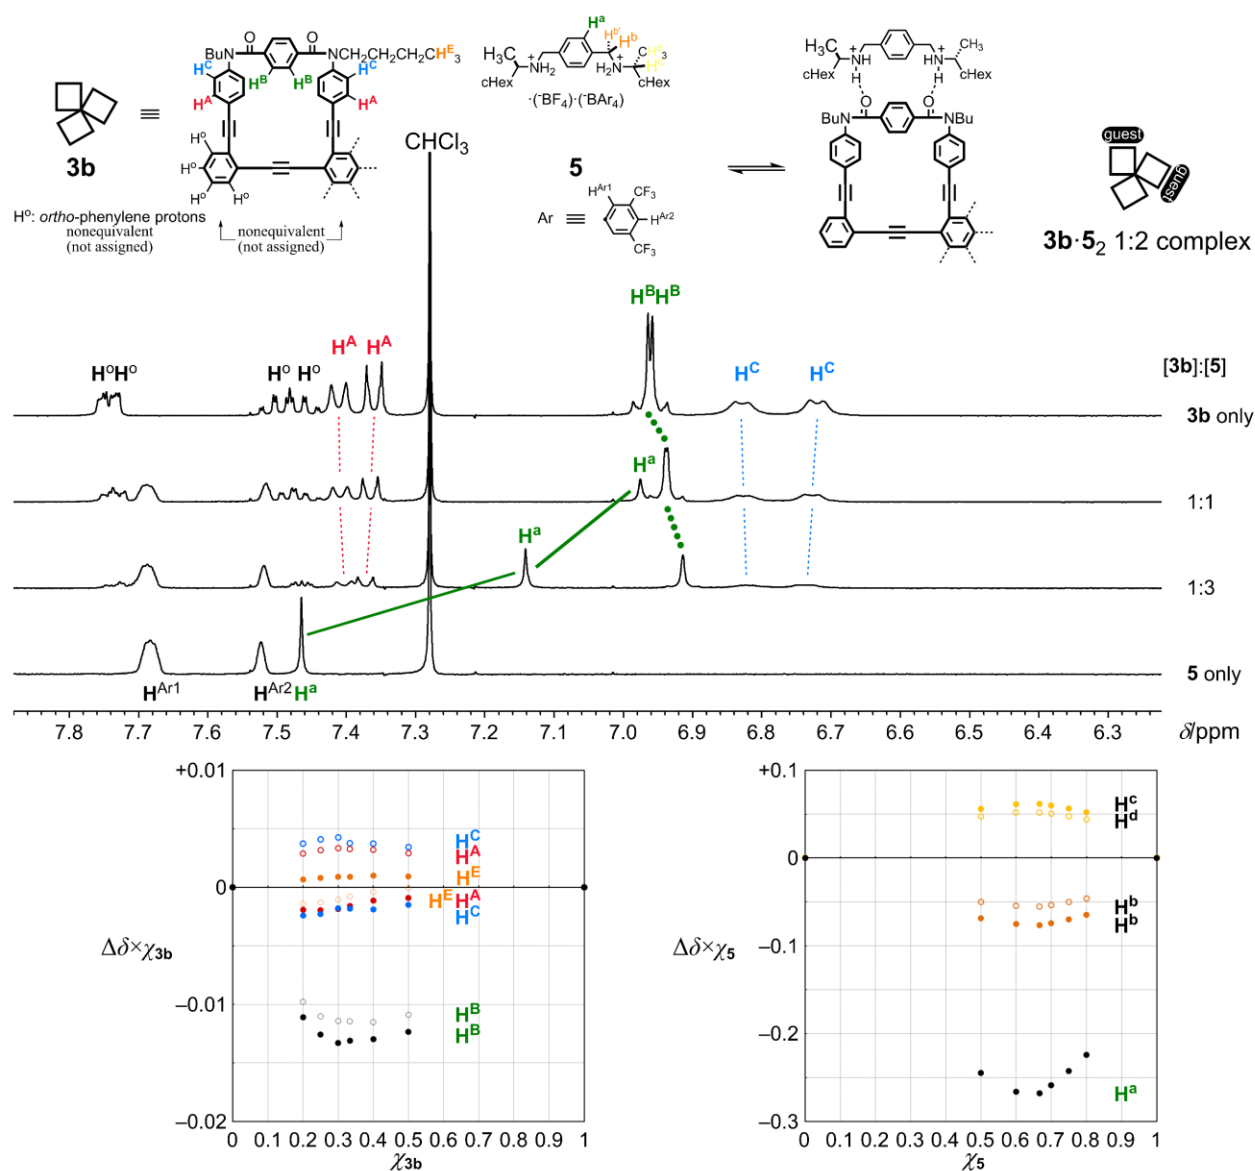

**Fig. S4** Partial  $^1\text{H}$  NMR spectra (aromatic region) of  $\mathbf{3b}$  in the presence of  $(R)_2\text{-5}$  ( $[\mathbf{3b}]:[\mathbf{5}] = 10:0$  ( $\mathbf{3b}$  only), 1:1, 1:3 and 0:10 ( $\mathbf{5}$  only)), and Job plots based on changes in the chemical shift ( $\Delta\delta = \delta_{\mathbf{3b}\cdot\mathbf{5}} - \delta_{\mathbf{3b}}$  or  $\delta_5$ ) on complexation, measured in 3 vol% acetonitrile- $d_3$ /chloroform- $d$  at 303 K.  $\chi$  denotes the molar fraction,  $[\mathbf{3b}]$  or  $[\mathbf{5}]/([\mathbf{3b}]+[\mathbf{5}])$ ,  $[\mathbf{3b}]+[\mathbf{5}] = 2$  mM.



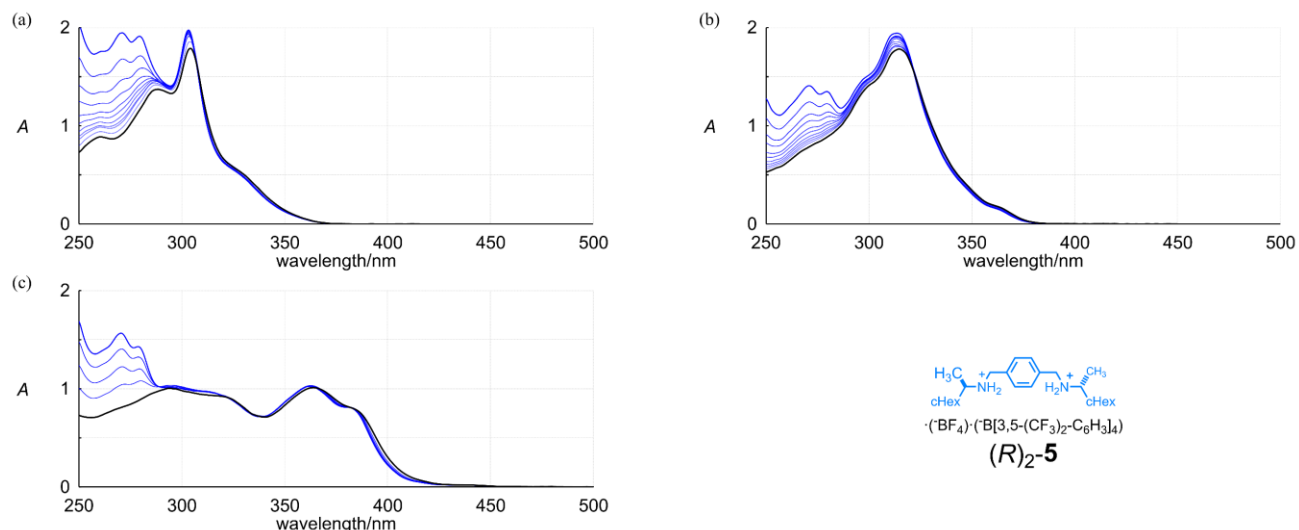

**Fig. S5** UV spectra of (a) **1b** ( $[1b] = 2.28 \times 10^{-4}$  M), (b) **2b** ( $[2b] = 1.34 \times 10^{-4}$  M), and (c) **3b** ( $[3b] = 1.31 \times 10^{-4}$  M) in the presence of  $(R)_2-5$  [0 equiv., black line) and (a) 0.25, 0.50, 0.75, 1.0, 1.5, 2.0, 3.0, 4.0, 6.0 and 8.0 equiv., (b) 0.25, 0.50, 0.75, 1.0, 1.5, 2.0, 3.0, 4.0, 6.0 and 8.0 equiv., (c) 3.0, 6.0, 9.0 and 12 equiv. (blue lines)]. All spectra were measured in dichloromethane at room temperature. Cell length = 0.1 cm.

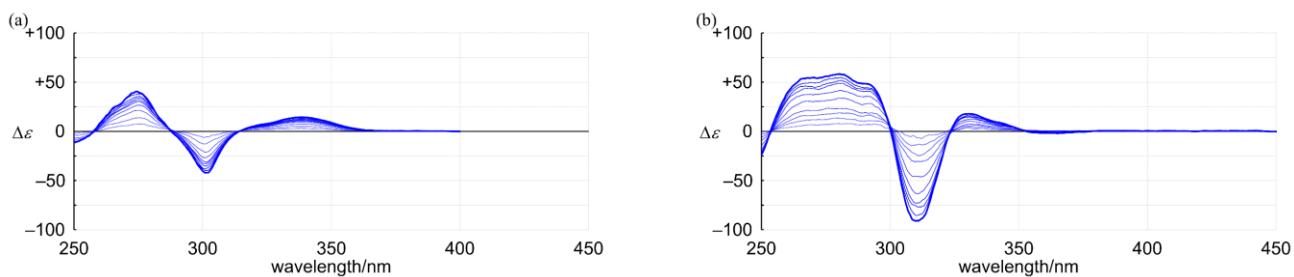

**Fig. S6** CD spectra of (a) **1b** ( $[1b] = 2.28 \times 10^{-4}$  M) and (b) **2b** ( $[2b] = 1.34 \times 10^{-4}$  M) in the presence of  $(R)_2-5$  (0.25, 0.50, 0.75, 1.0, 1.5, 2.0, 3.0, 4.0, 6.0 and 8.0 equiv.). All spectra were measured in dichloromethane at 293 K.

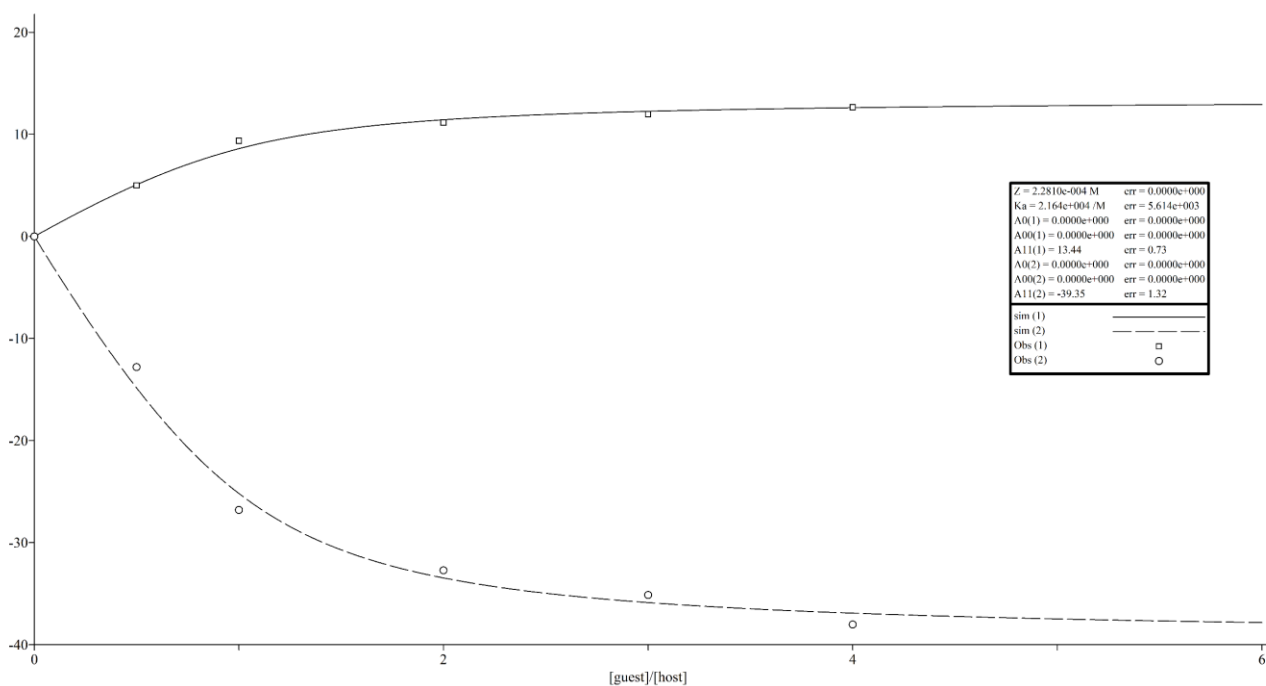

**Fig. S7A** Titration curves 1:1-fitted with a program of TitrationFit software<sup>3</sup>, based on plots of complexation-induced molar CDs [ $\Delta\epsilon$  at 301 nm (circle) and 338 nm (square)] versus equivalents of (*R*)<sub>2</sub>-5 added to a solution of **1b** (**1b**) =  $2.28 \times 10^{-4}$  M), measured in dichloromethane at 293 K.

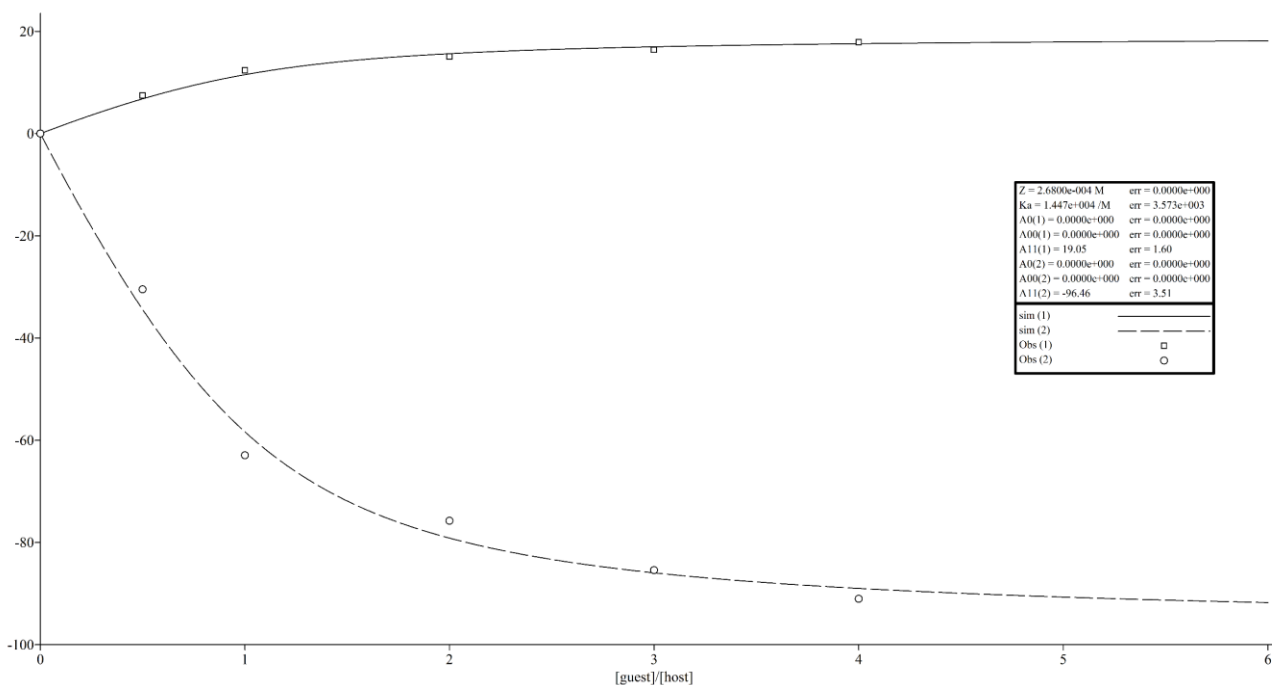

**Fig. S7B** Titration curves 1:1-fitted with a program of TitrationFit software<sup>3</sup>, based on plots of complexation-induced molar CDs [ $\Delta\epsilon$  at 310 nm (circle) and 331 nm (square)] versus equivalents of (*R*)<sub>2</sub>-5 added to a solution of **2b** (**2b**) =  $1.34 \times 10^{-4}$  M, [Terephthalamide] =  $2.68 \times 10^{-4}$  M), measured in dichloromethane at 293 K.

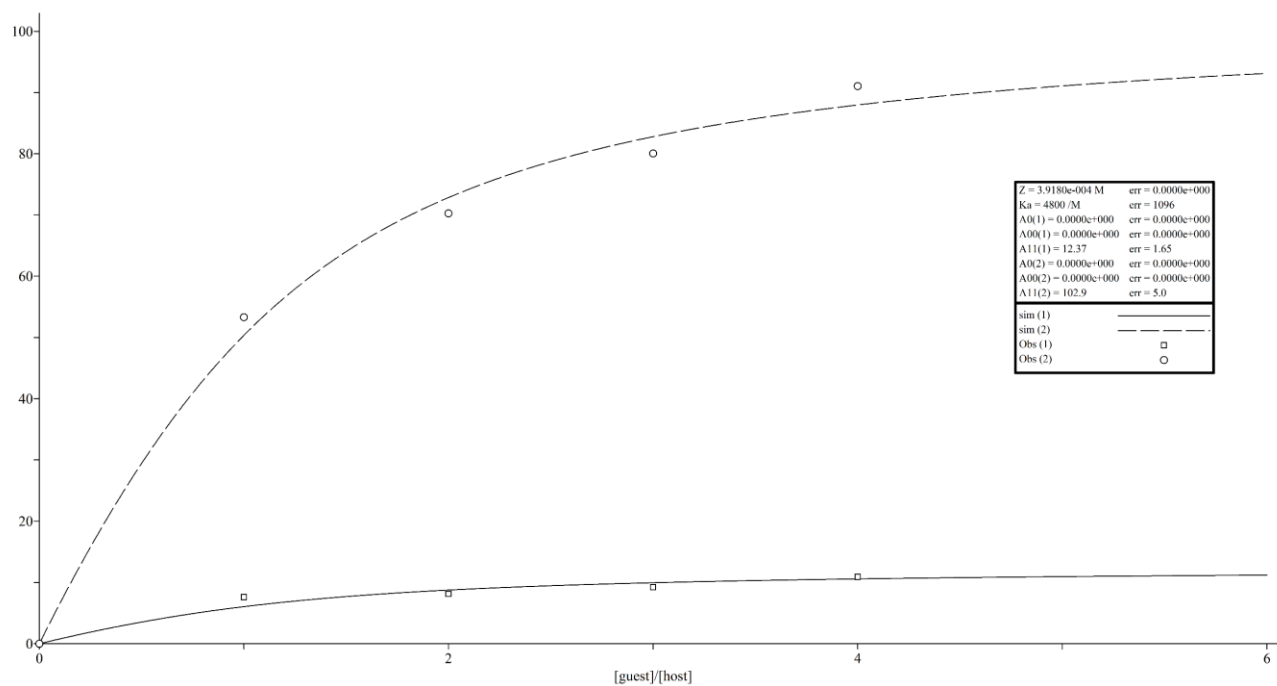

**Fig. S7C** Titration curves 1:1-fitted with a program of TitrationFit software<sup>3</sup>, based on plots of complexation-induced molar CDs [ $\Delta\epsilon$  at 313.5 nm (circle) and 334 nm (square)] versus equivalents of (*R*)<sub>2</sub>-**5** added to a solution of **3b** (**[3b]** =  $1.31 \times 10^{-4}$  M, [Terephthalamide] =  $3.92 \times 10^{-4}$  M), measured in dichloromethane at 293 K.

## Experimental

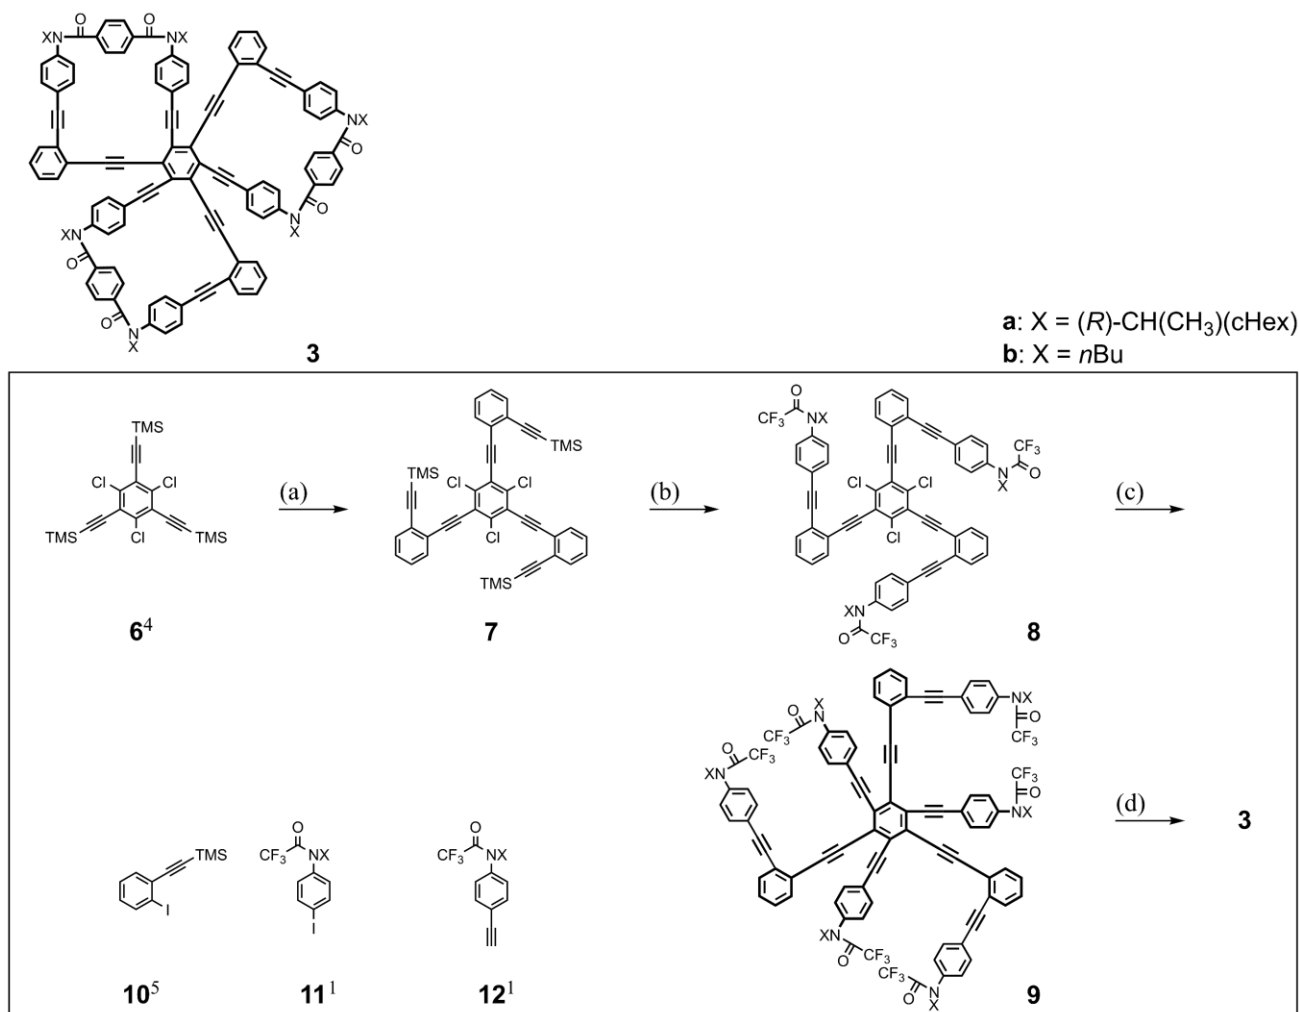

### (a) Preparation of **7**

To a solution of **6** (250 mg, 0.532 mmol) in THF (3 mL) and MeOH (1 mL) was added K<sub>2</sub>CO<sub>3</sub> (221 mg, 1.60 mmol) at room temperature. The mixture was stirred at room temperature for 30 min and diluted with water and dichloromethane. The organic layer was separated, dried over magnesium sulfate, and then purified by column chromatography on SiO<sub>2</sub> (dichloromethane) to give **6'** as a pale pinkish white solid (127 mg, 94%), which was immediately subjected to the next reaction.

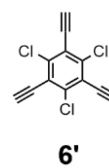

To a solution of **10** (5.72 g, 19.1 mmol), Pd(PPh<sub>3</sub>)<sub>4</sub> (295 mg, 0.255 mmol) and CuI (98 mg, 0.51 mmol) in THF (85 mL) and <sup>i</sup>Pr<sub>2</sub>NH (85 mL) was added a solution of **6'** (1.07 g, 4.23 mmol) in THF (15 mL) at 51 °C via a syringe pump over 2.5 h under an argon atmosphere and the mixture was further stirred at that temperature for 3 h. After removal of a solid by filtration through a Celite pad, the filtrate was concentrated and purified by column chromatography on SiO<sub>2</sub> (dichloromethane/hexane) to give **7** (1.75 g) as a white amorphous solid in 54% yield. An analytical sample was obtained as a white amorphous solid by further purification through GPC (chloroform; JAIGEL-1H & 2H, Japan Analytical Industry Co., Ltd., Japan).

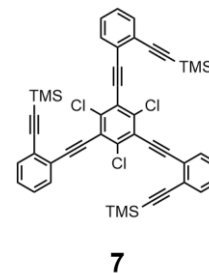

**7:** mp 128-129 °C; IR (KBr)  $\nu_{\text{max}}/\text{cm}^{-1}$  2958, 2216, 2159, 1479, 1441, 1387, 1371, 1249, 865, 841, 756, 644, 510; <sup>1</sup>H

NMR  $\delta_{\text{H}}$ (400 MHz;  $\text{CDCl}_3$ ;  $\text{Me}_4\text{Si}$ )/ppm 7.64-7.60 (3H, m), 7.57-7.52 (3H, m), 7.36-7.31 (6H, m), 0.25 (27H, s);  $^{13}\text{C}$  NMR  $\delta_{\text{C}}$ (100 MHz;  $\text{CDCl}_3$ )/ppm 138.4, 132.8, 132.7, 128.9, 128.2, 125.6, 124.9, 123.0, 102.9, 99.4, 99.4, 86.6, 0.0; FD-LRMS  $m/z$  768.1 ( $\text{M}^+$ , 80%), 769.1 ( $[\text{M}+1]^+$ , 54), 770.1 ( $[\text{M}+2]^+$ , 100), 771.1 ( $[\text{M}+3]^+$ , 59), 772.1 ( $[\text{M}+4]^+$ , 52), 773.1 ( $[\text{M}+5]^+$ , 26); FD-HRMS Found: 768.14164, Calc. for  $\text{C}_{45}\text{H}_{39}\text{Cl}_3\text{Si}_3$ : 768.14251.

### (b) Preparation of **8a** and **8b**

To a solution of **7**, **11a/b**,  $\text{Pd}(\text{PPh}_3)_4$  and  $\text{CuI}$  in THF and  $\text{Et}_3\text{N}$  was added a solution of TBAF in THF under an argon atmosphere. The reaction mixture was diluted with ethyl acetate, which was passed through a Celite/ $\text{SiO}_2$  pad. The filtrate was concentrated and purified by column chromatography on  $\text{SiO}_2$  (dichloromethane/hexane) to give **8 (a)**: 482 mg, 85%) as a yellowish white amorphous solid. For **8b**, the product was dissolved in  $\text{CH}_2\text{Cl}_2$  (90 mL) containing a small amount of  $\text{Et}_3\text{N}$  (2 mL), which was treated with trifluoroacetic anhydride (1.8 mL), washed with aq. satd.  $\text{NaHCO}_3$ , dried over magnesium sulfate, and then purified by column chromatography on  $\text{SiO}_2$  (dichloromethane/hexane) to give **8b** as a yellow amorphous solid (2.07 g, 83%). Each analytical sample was obtained as a white amorphous solid by further purification through GPC (chloroform).

|           | <b>7</b>               | <b>11a/b</b>       | $\text{Pd}(\text{PPh}_3)_4$ | $\text{CuI}$       | 1M TBAF           | addition        | THF/ $\text{Et}_3\text{N}$ |
|-----------|------------------------|--------------------|-----------------------------|--------------------|-------------------|-----------------|----------------------------|
| <b>8a</b> | 301 mg<br>(0.391 mmol) | 995 mg (2.34 mmol) | 41 mg (0.035 mmol)          | 12 mg (0.063 mmol) | 1.2 mL (1.2 mmol) | 61 °C<br>20 min | 18 mL/18 mL                |
| <b>8b</b> | 1.50 g (1.95 mmol)     | 4.34 g (11.7 mmol) | 203 mg (0.176 mmol)         | 50 mg (0.26 mmol)  | 6.1 mL (6.1 mmol) | 60 °C<br>1 h    | 45 mL/45 mL                |

**8a**: mp 125-127 °C;  $[\alpha]_{\text{D}}^{26} = -29$  ( $c = 0.10$ , chloroform); IR (KBr)  $\nu_{\text{max}}/\text{cm}^{-1}$  2930, 2852, 2213, 1695, 1509, 1447, 1419, 1372, 1207, 1188, 1150, 831, 756, 560;  $^1\text{H}$  NMR  $\delta_{\text{H}}$ (400 MHz;  $\text{CDCl}_3$ ;  $\text{Me}_4\text{Si}$ )/ppm 7.64-7.59 (6H, m), 7.57-7.48 (6H, br.m), 7.43-7.35 (6H, m), 7.18-7.07 (6H, br.m), 4.35 (3H, dq,  $J = 6.8, 10$  Hz), 1.92 (3H, br.d), 1.79-1.49 (12H, m), 1.46-1.33 (3H, m), 1.33-0.97 (12H, m), 1.03 (9H, d,  $J = 6.8$  Hz), 0.97-0.79 (3H, m);  $^{13}\text{C}$  NMR  $\delta_{\text{C}}$ (100 MHz;  $\text{CDCl}_3$ )/ppm 156.8 ( $\text{C}(\text{=O})\text{CF}_3$ ), 138.4, 136.0, 132.7, 132.3, 132.2, 132.1, 130.7, 129.3, 129.2, 128.5, 125.3, 124.6, 124.2, 123.0, 116.4 ( $\text{CF}_3$ ), 99.5, 92.2, 89.6, 86.5, 59.8, 40.3, 30.6, 29.7, 26.1, 25.9, 25.7, 16.2; FD-LRMS  $m/z$  1443.3 ( $\text{M}^+$ , 72%), 1444.3 ( $[\text{M}+1]^+$ , 68), 1445.3 ( $[\text{M}+2]^+$ , 100), 1446.3 ( $[\text{M}+3]^+$ , 75), 1447.3 ( $[\text{M}+4]^+$ , 56), 1448.3 ( $[\text{M}+5]^+$ , 32), 1449.3 ( $[\text{M}+6]^+$ , 15); FD-HRMS Found: 1443.42597, Calc. for  $\text{C}_{84}\text{H}_{69}\text{Cl}_3\text{F}_9\text{N}_3\text{O}_3$ : 1443.42608.

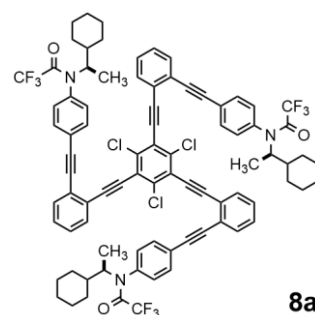

**8a**

**8b**: mp 95-97 °C; IR (KBr)  $\nu_{\text{max}}/\text{cm}^{-1}$  2931, 2213, 1698, 1510, 1384, 1208, 1151, 846, 756;  $^1\text{H}$  NMR  $\delta_{\text{H}}$ (400 MHz;  $\text{CDCl}_3$ ;  $\text{Me}_4\text{Si}$ )/ppm 7.64-7.59 (6H, m), 7.55 (6H, d,  $J = 8.4$  Hz), 7.43-7.35 (6H, m), 7.15 (6H, d,  $J = 8.4$  Hz), 3.68 (6H, t,  $J = 7.6$  Hz), 1.52-1.44 (6H, m), 1.31-1.21 (6H, m), 0.84 (9H, t,  $J = 7.6$  Hz);  $^{13}\text{C}$  NMR  $\delta_{\text{C}}$ (100 MHz;  $\text{CDCl}_3$ )/ppm 156.4 ( $\text{C}(\text{=O})\text{CF}_3$ ), 138.9, 138.4, 132.7, 132.7, 132.3, 129.2, 128.5, 128.3, 125.2, 124.6, 124.0, 123.0, 116.3 ( $\text{CF}_3$ ), 99.5, 92.2, 89.5, 86.5, 51.5, 28.8, 19.7, 13.6; FD-LRMS  $m/z$  1281.2 ( $\text{M}^+$ , 80%), 1282.2 ( $[\text{M}+1]^+$ , 65), 1283.2 ( $[\text{M}+2]^+$ , 100), 1284.2 ( $[\text{M}+3]^+$ , 70), 1285.2 ( $[\text{M}+4]^+$ , 52), 1286.2 ( $[\text{M}+5]^+$ , 28), 1287.1 ( $[\text{M}+6]^+$ , 13); FD-HRMS Found: 1281.28474, Calc.

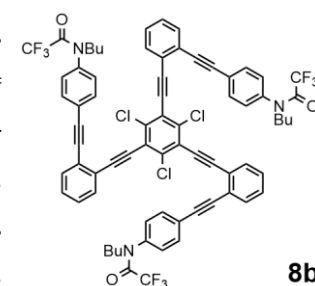

**8b**

for C<sub>72</sub>H<sub>51</sub>Cl<sub>3</sub>F<sub>9</sub>N<sub>3</sub>O<sub>3</sub>: 1281.28523.

(c) Preparation of **9a** and **9b**

To a solution of **8a/b** and **12a/b** in 1,4-dioxane and <sup>t</sup>Pr<sub>2</sub>NH were added PdCl<sub>2</sub>(CH<sub>3</sub>CN)<sub>2</sub>, X-Phos<sup>6</sup> and CuI at room temperature under an argon atmosphere. The mixture was stirred at 90 °C for 23 h for **9a** or 28 h for **9b**. After removal of a solid by filtration through a Celite pad, the filtrate was concentrated and purified by column chromatography on SiO<sub>2</sub> (dichloromethane-ethyl acetate/dichloromethane for **9a** or dichloromethane/hexane-ethyl acetate/dichloromethane for **9b**), followed by GPC (chloroform) to give **9** (**a**: 479 mg, 63% and **b**: 320 mg, 69%) as a brown solid. Each analytical sample was obtained as a yellow amorphous solid by further purification through HPLC with a standard normal-phase column (0.5vol% for **9a** or 1vol% for **9b** tetrahydrofuran/dichloromethane; YMC-Pack SIL, SIL-06, YMC Co., Ltd., Japan).

|           | <b>8a/b</b>         | <b>12a/b</b>       | PdCl <sub>2</sub> (CH <sub>3</sub> CN) <sub>2</sub> | X-Phos             | CuI                | dioxane/ <sup>t</sup> Pr <sub>2</sub> NH |
|-----------|---------------------|--------------------|-----------------------------------------------------|--------------------|--------------------|------------------------------------------|
| <b>9a</b> | 480 mg (0.332 mmol) | 3.22 g (9.96 mmol) | 13 mg (0.050 mmol)                                  | 47 mg (0.099 mmol) | 16 mg (0.084 mmol) | 6.4 mL/3.7 mL                            |
| <b>9b</b> | 300 mg (0.234 mmol) | 1.89 g (7.00 mmol) | 13 mg (0.050 mmol)                                  | 45 mg (0.093 mmol) | 18 mg (0.095 mmol) | 12 mL/7.3 mL                             |

**9a**: mp 136-137 °C; [ $\alpha$ ]<sub>D</sub><sup>26</sup> = -27 (*c* = 0.12, chloroform); IR (KBr)  $\nu_{\max}$ /cm<sup>-1</sup> 2931, 2853, 2204, 1698, 1509, 1449, 1415, 1207, 831, 756; <sup>1</sup>H NMR  $\delta_{\text{H}}$ (400 MHz; CDCl<sub>3</sub>; Me<sub>4</sub>Si)/ppm 7.71-7.66 (6H, m), 7.48-7.37 (18H, m), 6.99 (6H, d, *J* = 8.8 Hz), 6.97 (6H, d, *J* = 8.8 Hz), 4.36-4.24 (6H, m), 1.91 (3H, br.d), 1.86 (3H, br.d), 1.78-1.50 (24H, m), 1.43-0.80 (36H, m), 1.03 (9H, d, *J* = 6.8 Hz), 0.97 (9H, d, *J* = 7.2 Hz); <sup>13</sup>C NMR  $\delta_{\text{C}}$ (100 MHz; CDCl<sub>3</sub>)/ppm 156.7 (C(=O)CF<sub>3</sub>), 136.5, 135.8, 132.6, 132.3, 132.2, 132.1, 130.4, 129.1, 129.1, 128.9, 128.5, 127.8, 127.6, 125.4, 125.3, 123.9 123.6, 116.4 (CF<sub>3</sub>), 116.3 (CF<sub>3</sub>), 98.9, 98.3, 92.9, 90.2, 89.7, 88.5, 60.0, 59.8, 40.2, 40.1, 30.6, 30.5, 29.8, 29.7, 26.1, 26.0, 25.9, 25.8, 25.8, 25.6, 16.2, 16.1; FD-LRMS *m/z* 2304.9 (M<sup>+</sup>, 65%), 2305.9 ([M+1]<sup>+</sup>, 100), 2306.9 ([M+2]<sup>+</sup>, 79), 2307.9 ([M+3]<sup>+</sup>, 43), 2308.9 ([M+4]<sup>+</sup>, 19); FD-HRMS Found: 2304.94488, Calc. for C<sub>138</sub>H<sub>126</sub>F<sub>18</sub>N<sub>6</sub>O<sub>6</sub>: 2304.94514.

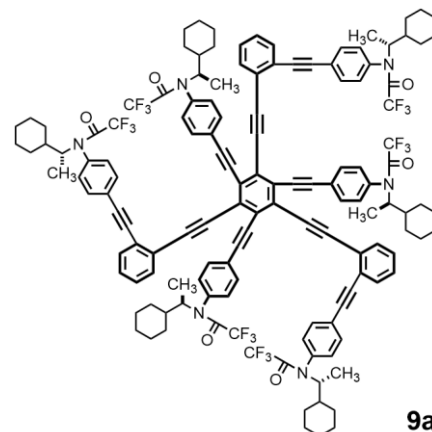

**9b**: mp 105-107 °C; IR (KBr)  $\nu_{\max}$ /cm<sup>-1</sup> 2960, 2934, 2874, 2205, 1698, 1510, 1427, 1209, 1149, 845, 756; <sup>1</sup>H NMR  $\delta_{\text{H}}$ (400 MHz; CDCl<sub>3</sub>; Me<sub>4</sub>Si)/ppm 7.71 (3H, br.d), 7.67 (3H, br.d), 7.48-7.40 (6H, m), 7.46 (6H, d, *J* = 8.4 Hz), 7.40 (6H, d, *J* = 8.4 Hz), 7.01 (6H, d, *J* = 8.4 Hz), 6.99 (6H, d, *J* = 8.4 Hz), 3.65 (6H, t, *J* = 7.2 Hz), 3.59 (6H, t, *J* = 7.2 Hz), 1.50-1.37 (12H, m), 1.34-1.17 (12H, m), 0.89 (9H, t, *J* = 7.2 Hz), 0.81 (9H, t, *J* = 7.2 Hz); <sup>13</sup>C NMR  $\delta_{\text{C}}$ (100 MHz; CDCl<sub>3</sub>)/ppm 156.3 (C(=O)CF<sub>3</sub>), 156.3 (C(=O)CF<sub>3</sub>), 139.3, 138.7, 133.0, 132.7, 132.2, 132.1, 129.2, 128.5, 128.1, 128.0, 127.8, 127.6, 125.3, 125.3, 123.7 123.4, 116.3 (CF<sub>3</sub>), 116.2 (CF<sub>3</sub>), 98.9, 98.3, 92.8, 90.2, 89.6, 88.4, 51.5, 51.5, 28.8, 28.8, 19.7, 19.7, 13.6, 13.5; FD-LRMS *m/z* 1980.6 (M<sup>+</sup>,

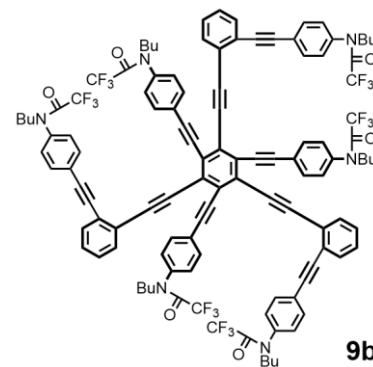

78%), 1981.6 ([M+1]<sup>+</sup>, 100), 1982.6 ([M+2]<sup>+</sup>, 65), 1983.6 ([M+3]<sup>+</sup>, 31), 1984.6 ([M+4]<sup>+</sup>, 11); FD-HRMS Found: 1980.66542, Calc. for C<sub>114</sub>H<sub>90</sub>F<sub>18</sub>N<sub>6</sub>O<sub>6</sub>: 1980.66344.

(d) Preparation of **3a** and **3b**

i) To an ice-cooled solution of **9a/b** and 60% NaH in THF was added MeOH. The mixture was stirred at room temperature for 25 min and quenched with water. After extraction with ethyl acetate, the organic layer was washed with water and brine, dried over magnesium sulfate, and then purified by column chromatography on Al<sub>2</sub>O<sub>3</sub> (dichloromethane/hexane) to give **9'** (**a**: 128 mg, 85% and **b**: 105 mg, 99%) as a yellow amorphous solid, which was immediately subjected to the next reaction.

ii) To a solution of **9a'/9b'** in toluene containing a small amount of Et<sub>3</sub>N was added terephthaloyl chloride, the mixture was stirred (**a**) at 100 °C for several hours while adding several portions of terephthaloyl chloride with an interval of 30 min or (**b**) at 85 °C for 45 min. After extraction with (**a**) ethyl acetate or (**b**) dichloromethane, the organic layer was washed with aq. 0.1M NaOH and brine, dried over magnesium sulfate, and then purified by column chromatography on Al<sub>2</sub>O<sub>3</sub>/SiO<sub>2</sub> (ethyl acetate/dichloromethane), followed by GPC (chloroform) to give **3** (**a**: 42 mg, 27% and **b**: 30 mg, 42%) as a yellow solid. Each analytical sample was obtained as a yellow solid by further purification through HPLC with a standard normal-phase column (ethyl acetate/dichloromethane for **3a** and tetrahydrofuran/chloroform for **3b**).

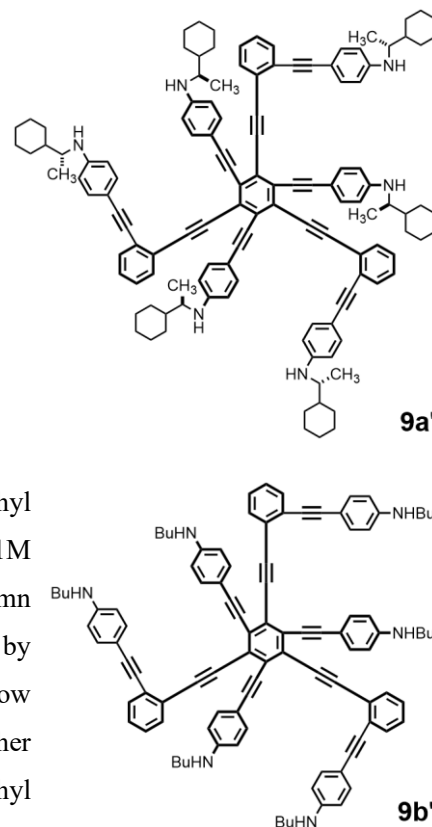

|           | <b>9a/b</b>             | 60% NaH in oil     | MeOH   | THF  | terephthaloyl chloride | Et <sub>3</sub> N | Toluene |
|-----------|-------------------------|--------------------|--------|------|------------------------|-------------------|---------|
| <b>3a</b> | 200 mg<br>(0.0867 mmol) | 420 mg (10.5 mmol) | 0.5 mL | 5 mL | 50 mg×7 (1.7 mmol)     | 0.3 mL            | 74 mL   |
| <b>3b</b> | 150 mg<br>(0.0757 mmol) | 61 mg (1.5 mmol)   | 0.5 mL | 5 mL | 27 mg (0.13 mmol)      | 0.2 mL            | 40 mL   |

**3a**: mp >300 °C; [ $\alpha$ ]<sub>D</sub><sup>23</sup> = -596 (*c* = 0.181, chloroform); IR (KBr)  $\nu_{\max}$ /cm<sup>-1</sup> 2929, 2853, 2202, 1655, 1600, 1510, 1384, 1318, 834, 757; <sup>1</sup>H NMR  $\delta_{\text{H}}$ (400 MHz; CDCl<sub>3</sub>; Me<sub>4</sub>Si)/ppm 7.78-7.76 (6H, m), 7.6-7.3 (18H, br.m), 7.2-6.9 (6H, br.), 6.94-6.89 (12H, br.d×2), 6.5 (6H, br.), 4.6-4.3 (6H, br.m), 2.2-2.0 (6H, br.m), 1.9-1.4 (30H, br.m), 1.4-0.8 (48H, br.m); <sup>13</sup>C NMR  $\delta_{\text{C}}$ (100 MHz; CDCl<sub>3</sub>)/ppm 170.4, 141.6, 138.1, 137.8, 132.9, 132.6, 132.3, 129.2, 128.4, 128.0, 127.5, 127.2, 127.1, 125.2, 125.1, 121.3, 121.2, 99.1, 97.9, 93.1, 90.5, 89.5, 88.4, 30.8, 30.2, 29.7, 26.2, 26.2, 26.1, 26.0, 26.0, 16.7; FD-LRMS *m/z* 2119.0 (M<sup>+</sup>, 49%), 2120.0 ([M+1]<sup>+</sup>, 93), 2121.0 ([M+2]<sup>+</sup>, 100), 2122.0 ([M+3]<sup>+</sup>, 67), 2123.0 ([M+4]<sup>+</sup>, 34); FD-HRMS

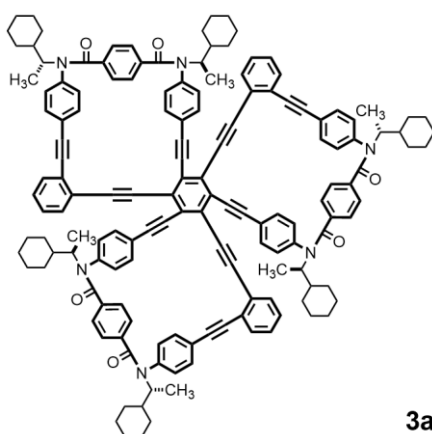

Found: 2119.06902, Calc. for  $C_{150}H_{138}N_6O_6$ : 2119.06779; UV  $\lambda_{\max}(\text{CH}_2\text{Cl}_2)/\text{nm}$  ( $\log \epsilon$ ) 387 (shoulder 4.71), 364 (4.83), 316 (sh. 4.80), 294 (4.84), 270 (s. 4.76); CD  $\lambda(\text{CH}_2\text{Cl}_2)/\text{nm}$  ( $\Delta\epsilon$  at 293 K) 394 (-6.4), 387 (-5.0), 377 (-6.2), 355 (-0.8), 336 (-12), 314 (-100), 292 (+35), 269 (-39).

**3b**: mp >300 °C; IR (KBr)  $\nu_{\max}/\text{cm}^{-1}$  2929, 2870, 2201, 1656, 1600, 1510, 1383, 1295, 1122, 836, 756;  $^1\text{H}$  NMR  $\delta_{\text{H}}(400 \text{ MHz}; \text{CDCl}_3; \text{Me}_4\text{Si})/\text{ppm}$  7.76-7.73 (6H, m), 7.52-7.44 (6H, m), 7.41 (6H, d,  $J = 8.4 \text{ Hz}$ ), 7.36 (6H, d,  $J = 8.8 \text{ Hz}$ ), 6.98 (6H, d,  $J = 8.4 \text{ Hz}$ ), 6.95 (6H, d,  $J = 8.4 \text{ Hz}$ ), 6.83 (6H, br.d), 6.72 (6H, br.d), 3.80 (12H, br.s), 1.53-1.43 (12H, m), 1.36-1.22 (12H, m), 0.87 (9H, t,  $J = 7.2 \text{ Hz}$ ), 0.78 (9H, t,  $J = 7.2 \text{ Hz}$ );  $^{13}\text{C}$  NMR  $\delta_{\text{C}}(100 \text{ MHz}; \text{CDCl}_3)/\text{ppm}$  169.9, 169.9, 143.5, 143.0, 137.5, 137.2, 133.0, 132.9, 132.6, 132.6, 129.2, 128.6, 128.4, 127.9, 127.5, 127.3, 127.3, 125.1, 125.0, 121.1, 99.0, 97.9, 92.9, 90.5, 89.3, 88.2, 49.3, 49.1,

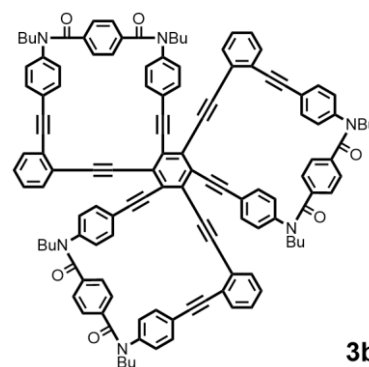

**3b**

29.7, 20.1, 20.0, 13.8, 13.7; FD-LRMS  $m/z$  1794.7 ( $M^+$ , 69%), 1795.7 ( $[M+1]^+$ , 100), 1796.7 ( $[M+2]^+$ , 75), 1797.7 ( $[M+3]^+$ , 38), 1798.7 ( $[M+4]^+$ , 15); FD-HRMS Found: 1794.78409, Calc. for  $C_{126}H_{102}N_6O_6$ : 1794.78609; UV  $\lambda_{\max}(\text{CH}_2\text{Cl}_2)/\text{nm}$  ( $\log \epsilon$ ) 385 (sh. 4.78), 364 (4.88), 320 (sh. 4.84), 295 (4.88), 265 (sh. 4.76).

#### References and note

- 1 R. Katoono, Y. Tanaka, K. Kusaka, K. Fujiwara and T. Suzuki, *J. Org. Chem.*, 2015, **80**, 7613.
- 2 R. Katoono, S. Kawai, K. Fujiwara and T. Suzuki, *Chem. Sci.*, 2015, **6**, 6592.
- 3 S. Akine, TitrationFit, program for analyses of host-guest complexation, Kanazawa University, Kanazawa, Japan, 2013.
- 4 Y. Tobe, N. Nakagawa, J. Kishi, M. Sonoda, K. Naemura, T. Wakabayashi, T. Shida and Y. Achiba, *Tetrahedron*, 2001, **57**, 3629.
- 5 H. Kinoshita, N. Hirai and K. Miura, *J. Org. Chem.*, 2014, **79**, 8171.
- 6 P. Ehlers, A. Neubauer, S. Lochbrunner, A. Villinger and P. Langer, *Org. Lett.*, 2011, **13**, 1618.



<sup>1</sup>H NMR spectrum (400 MHz) of **7**, measured in chloroform-*d* at room temperature.

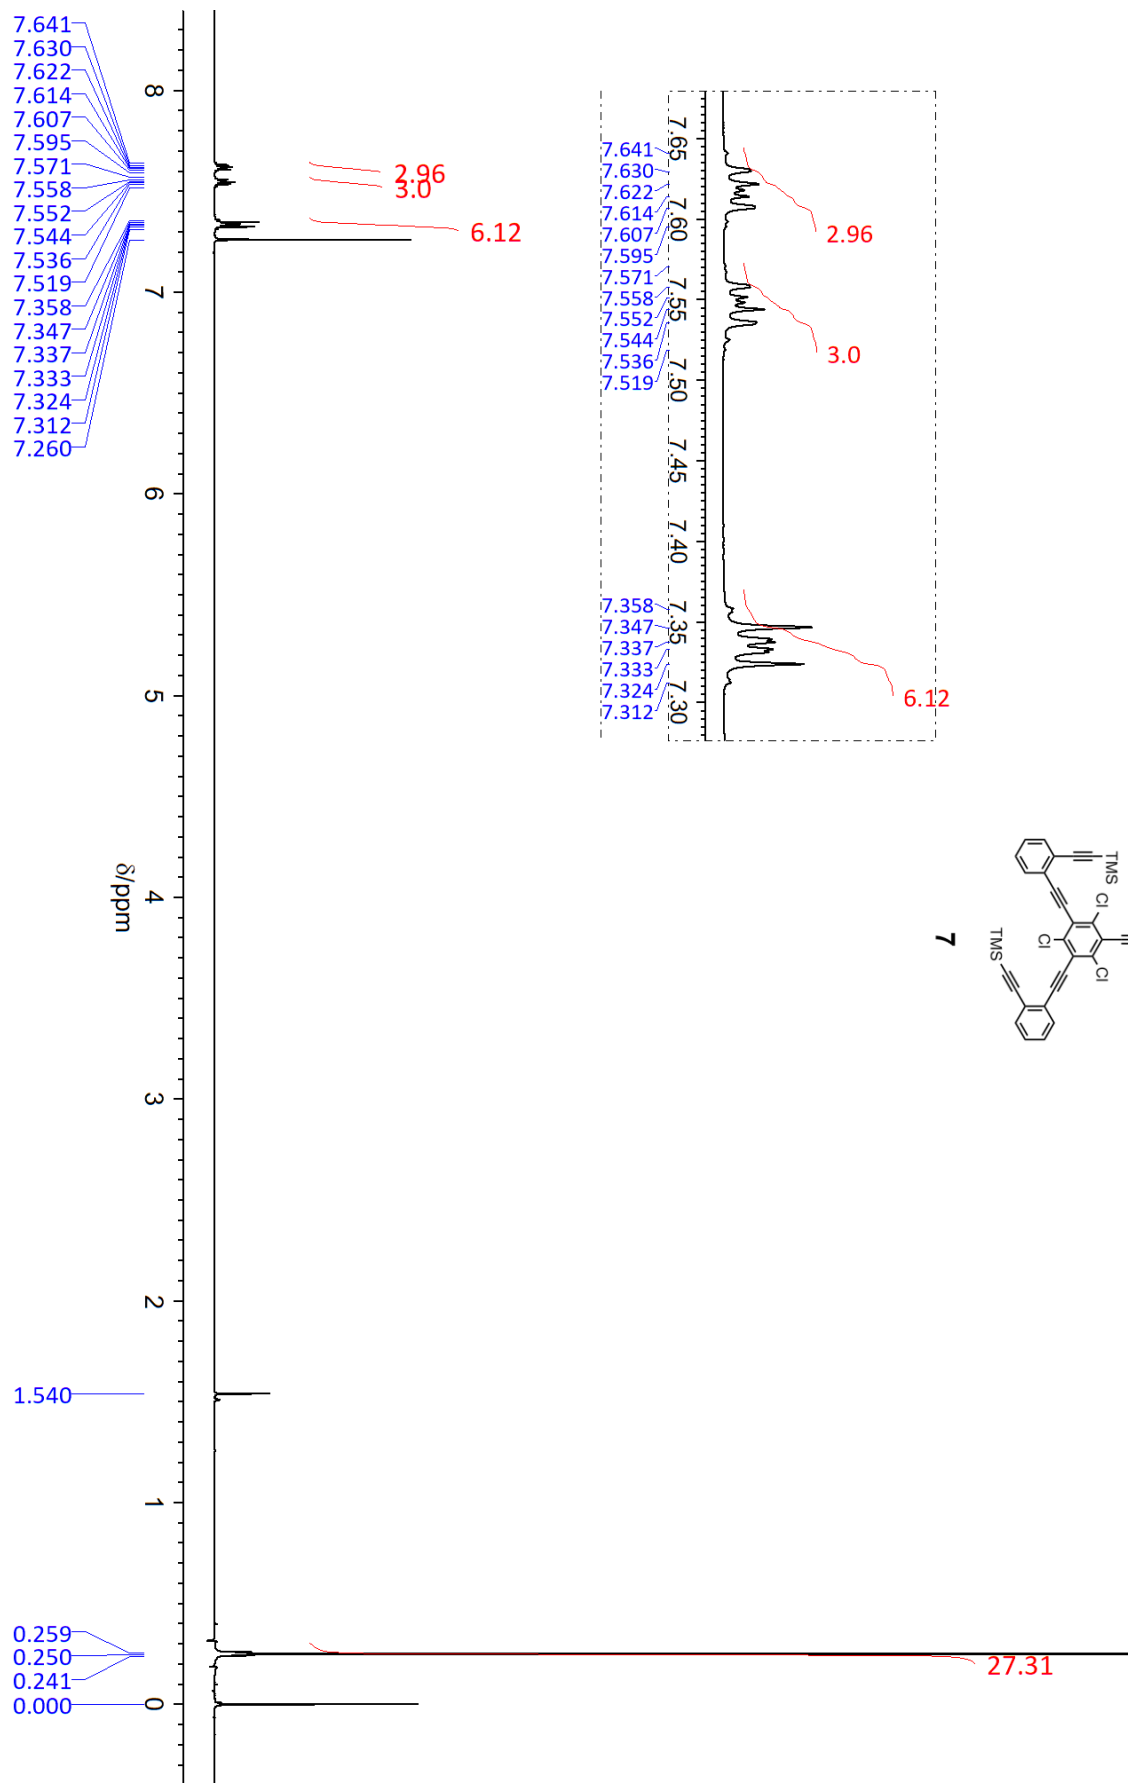

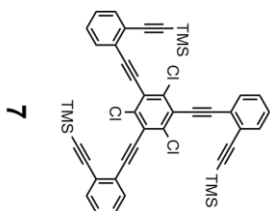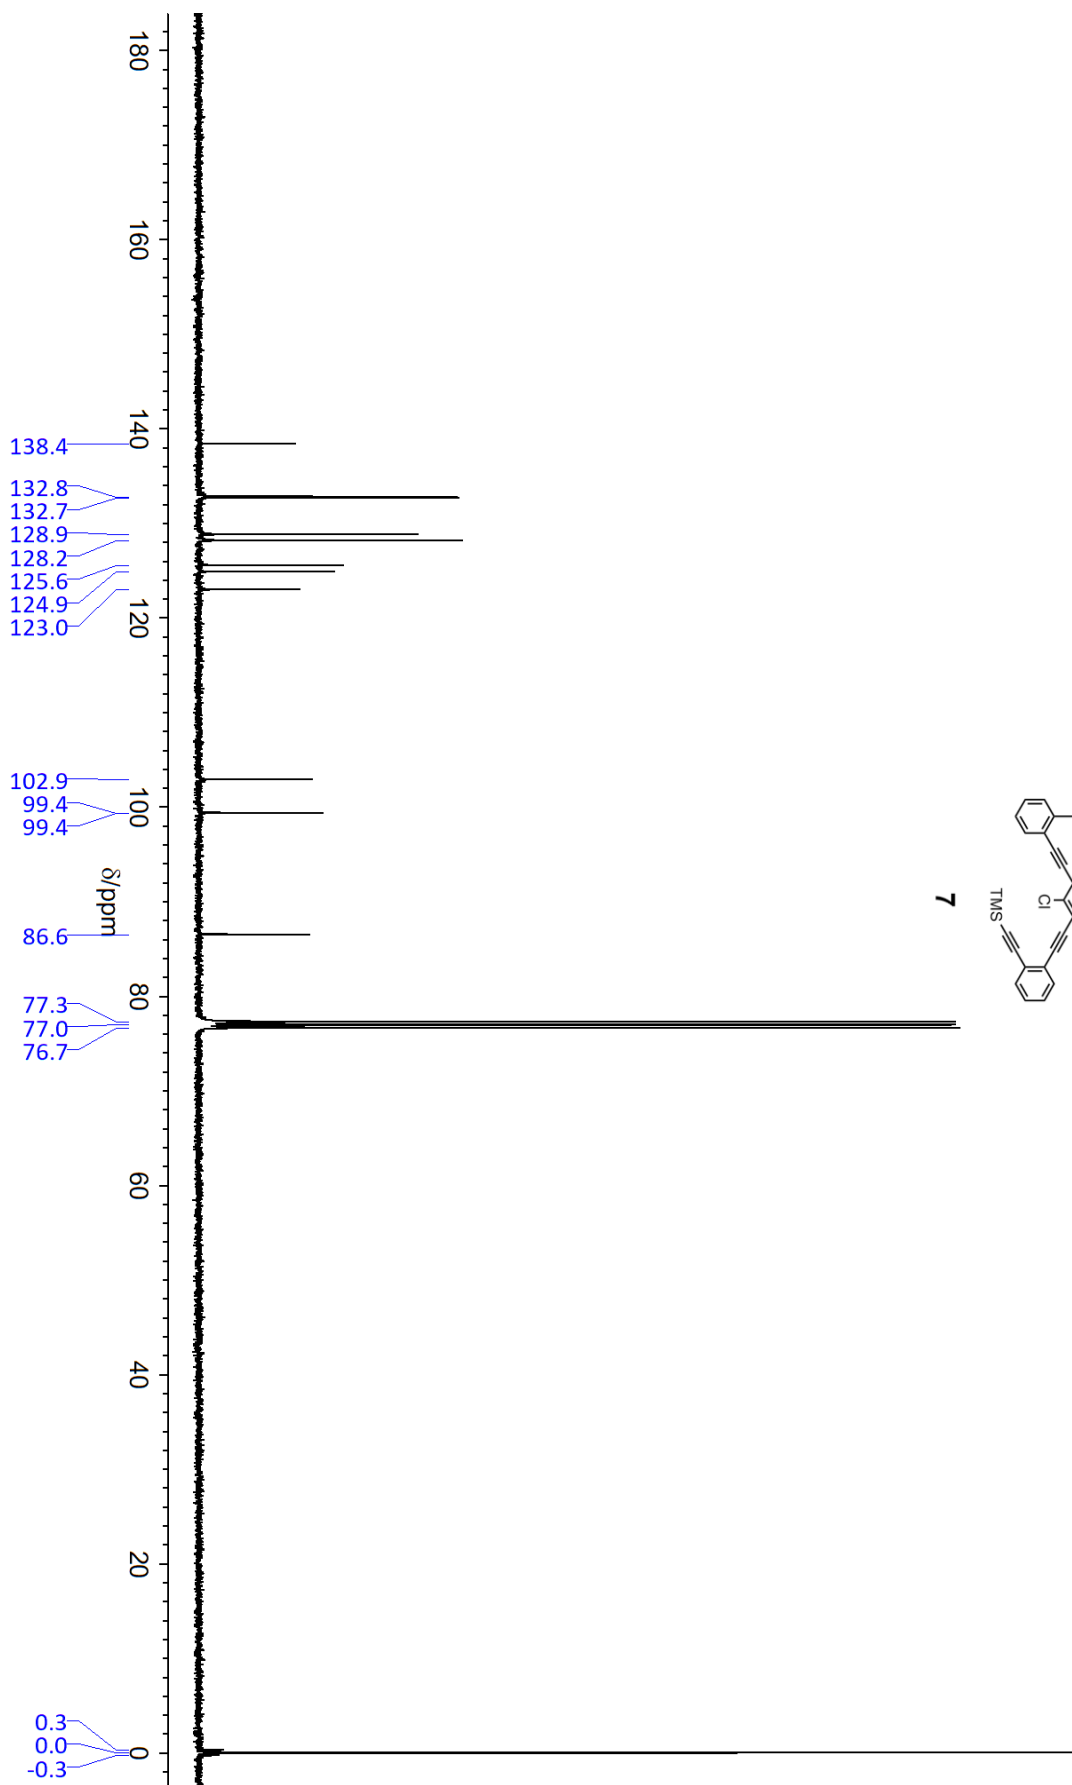

$^1\text{H}$  NMR spectrum (400 MHz) of **8a**, cont. residual hexane, measured in chloroform-*d* at room temperature.

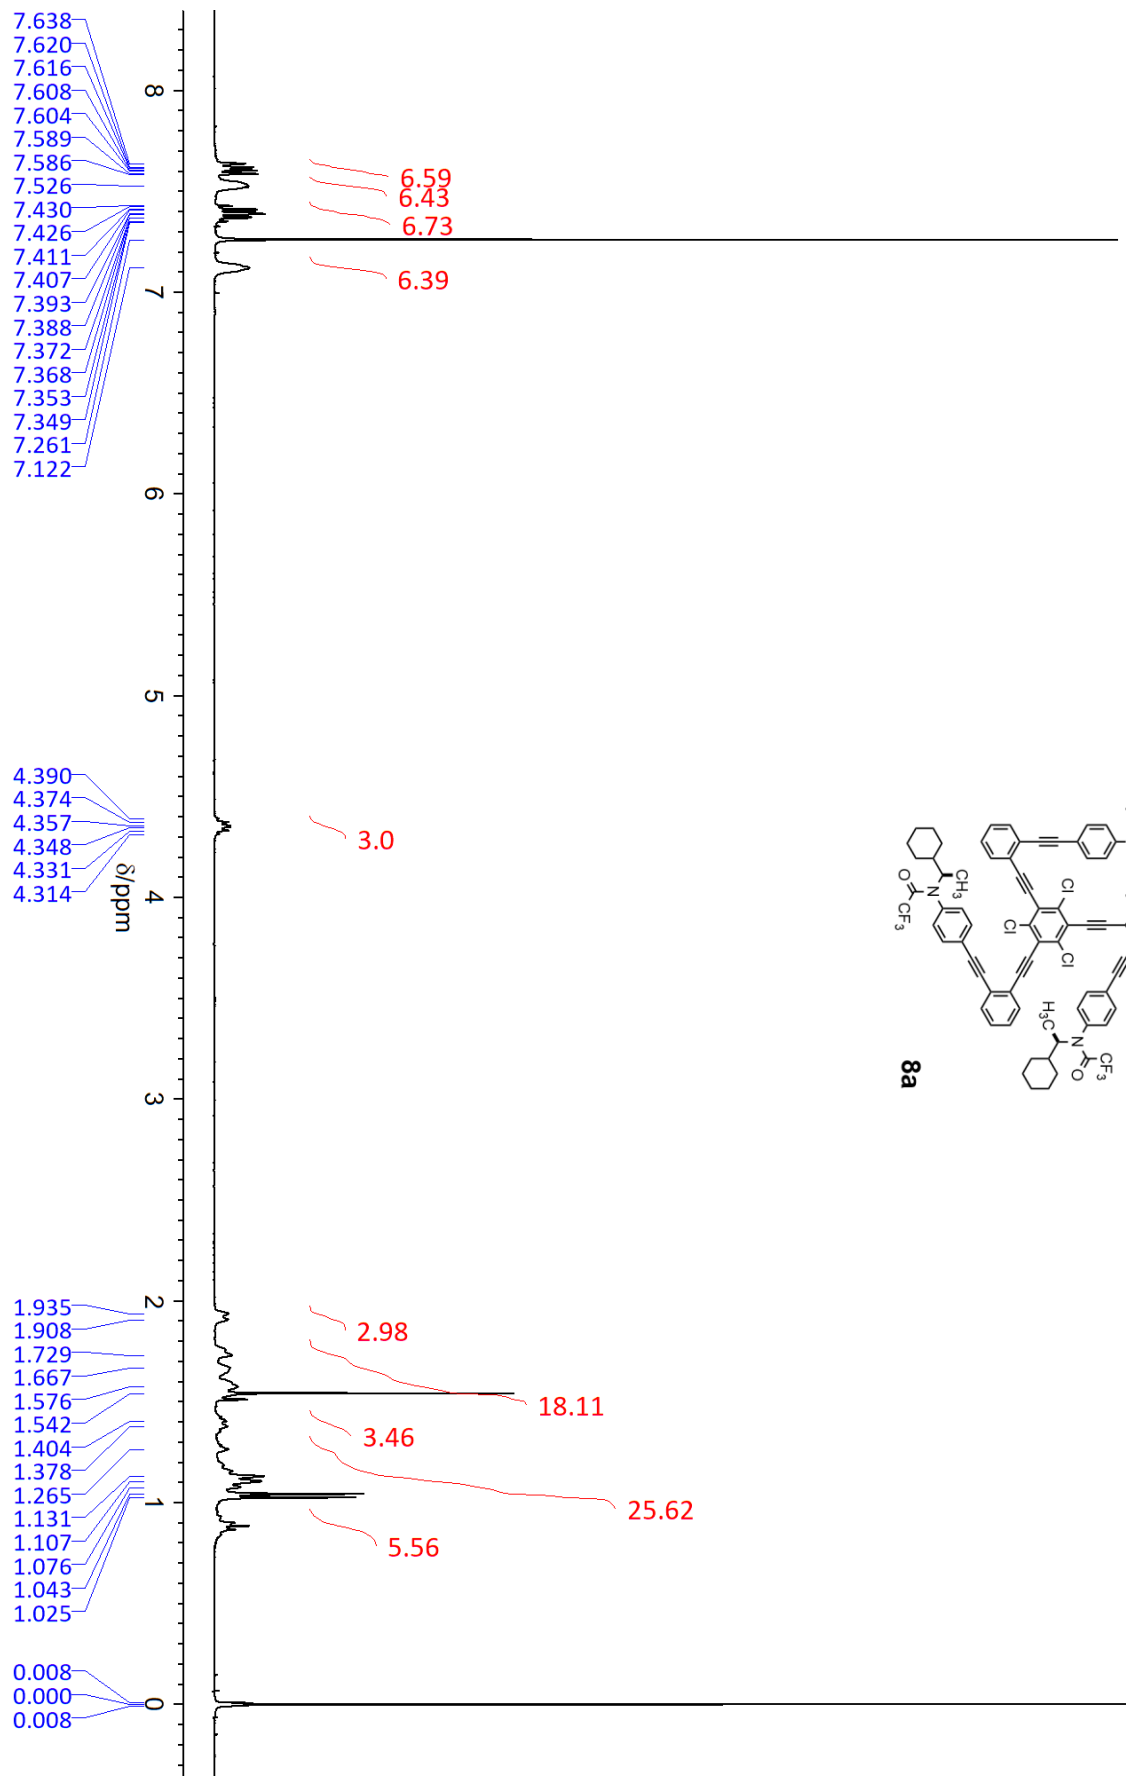

$^{13}\text{C}$  NMR spectrum (100 MHz) of **8a**, cont. residual hexane, measured in chloroform-*d* at room temperature.

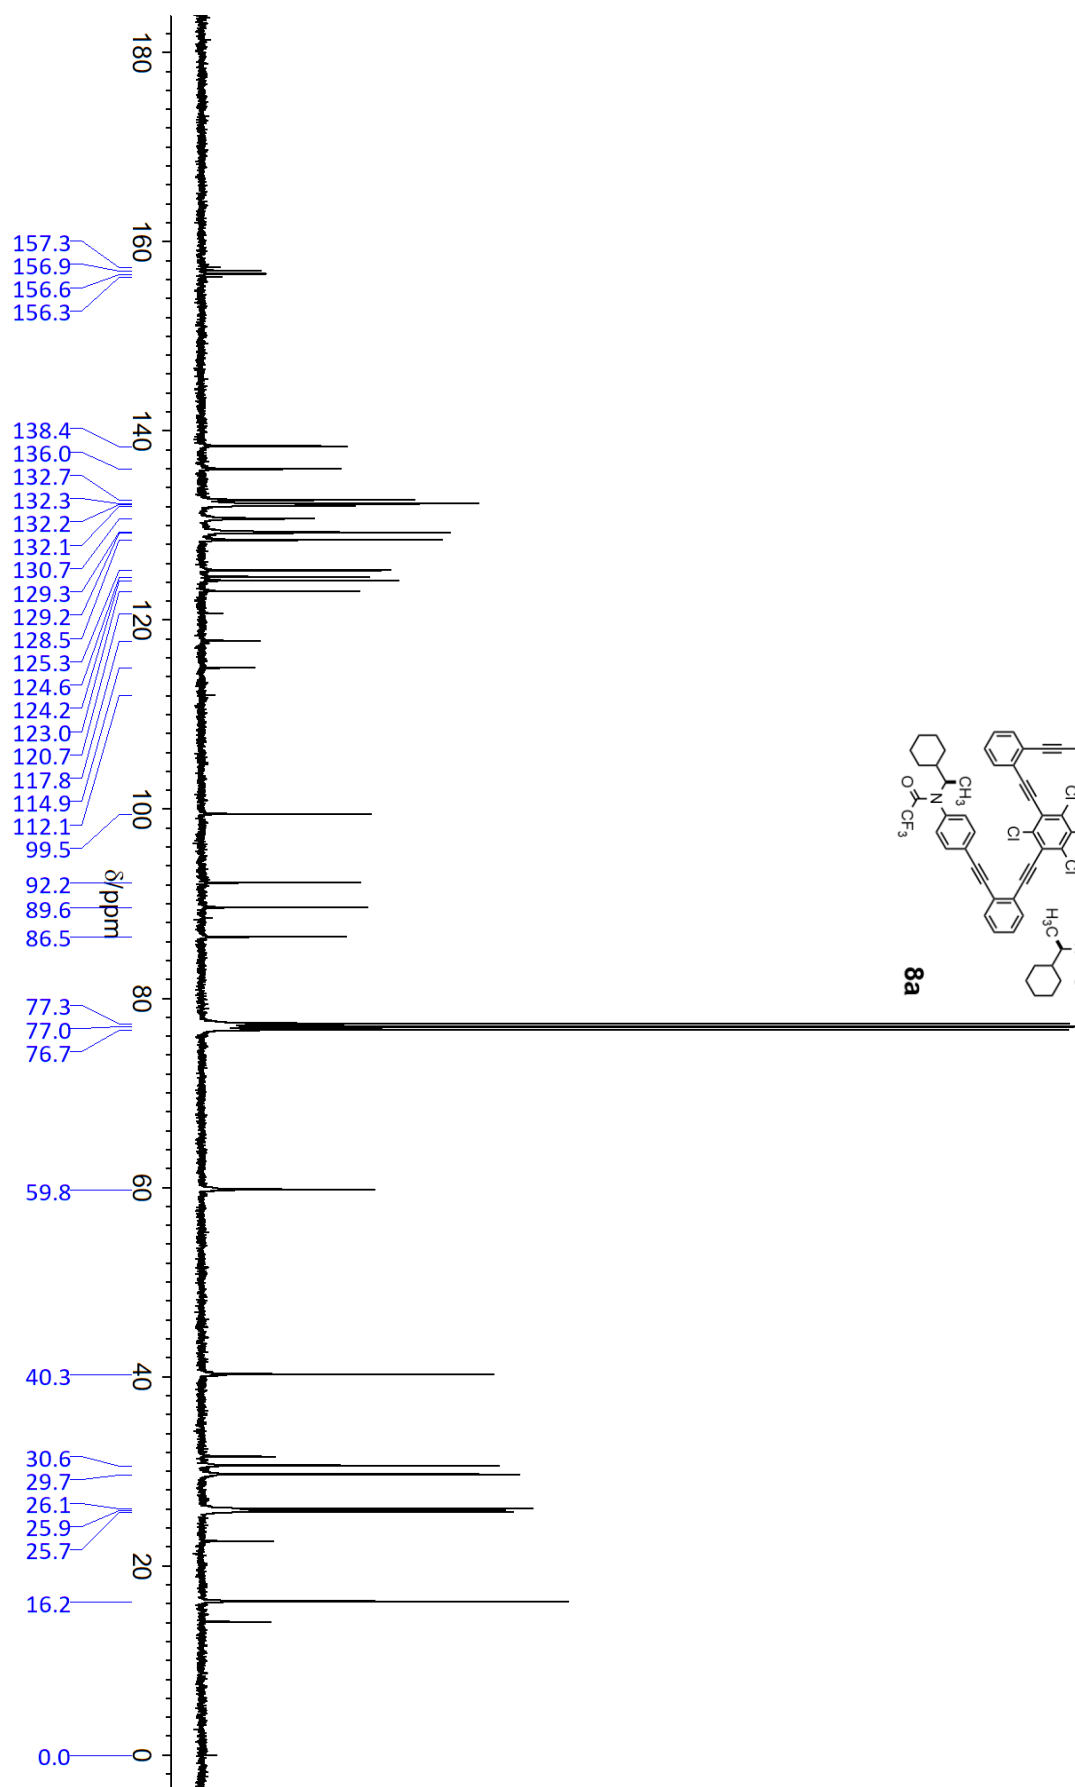

<sup>1</sup>H NMR spectrum (400 MHz) of **8b**, cont. residual hexane, measured in chloroform-*d* at room temperature.

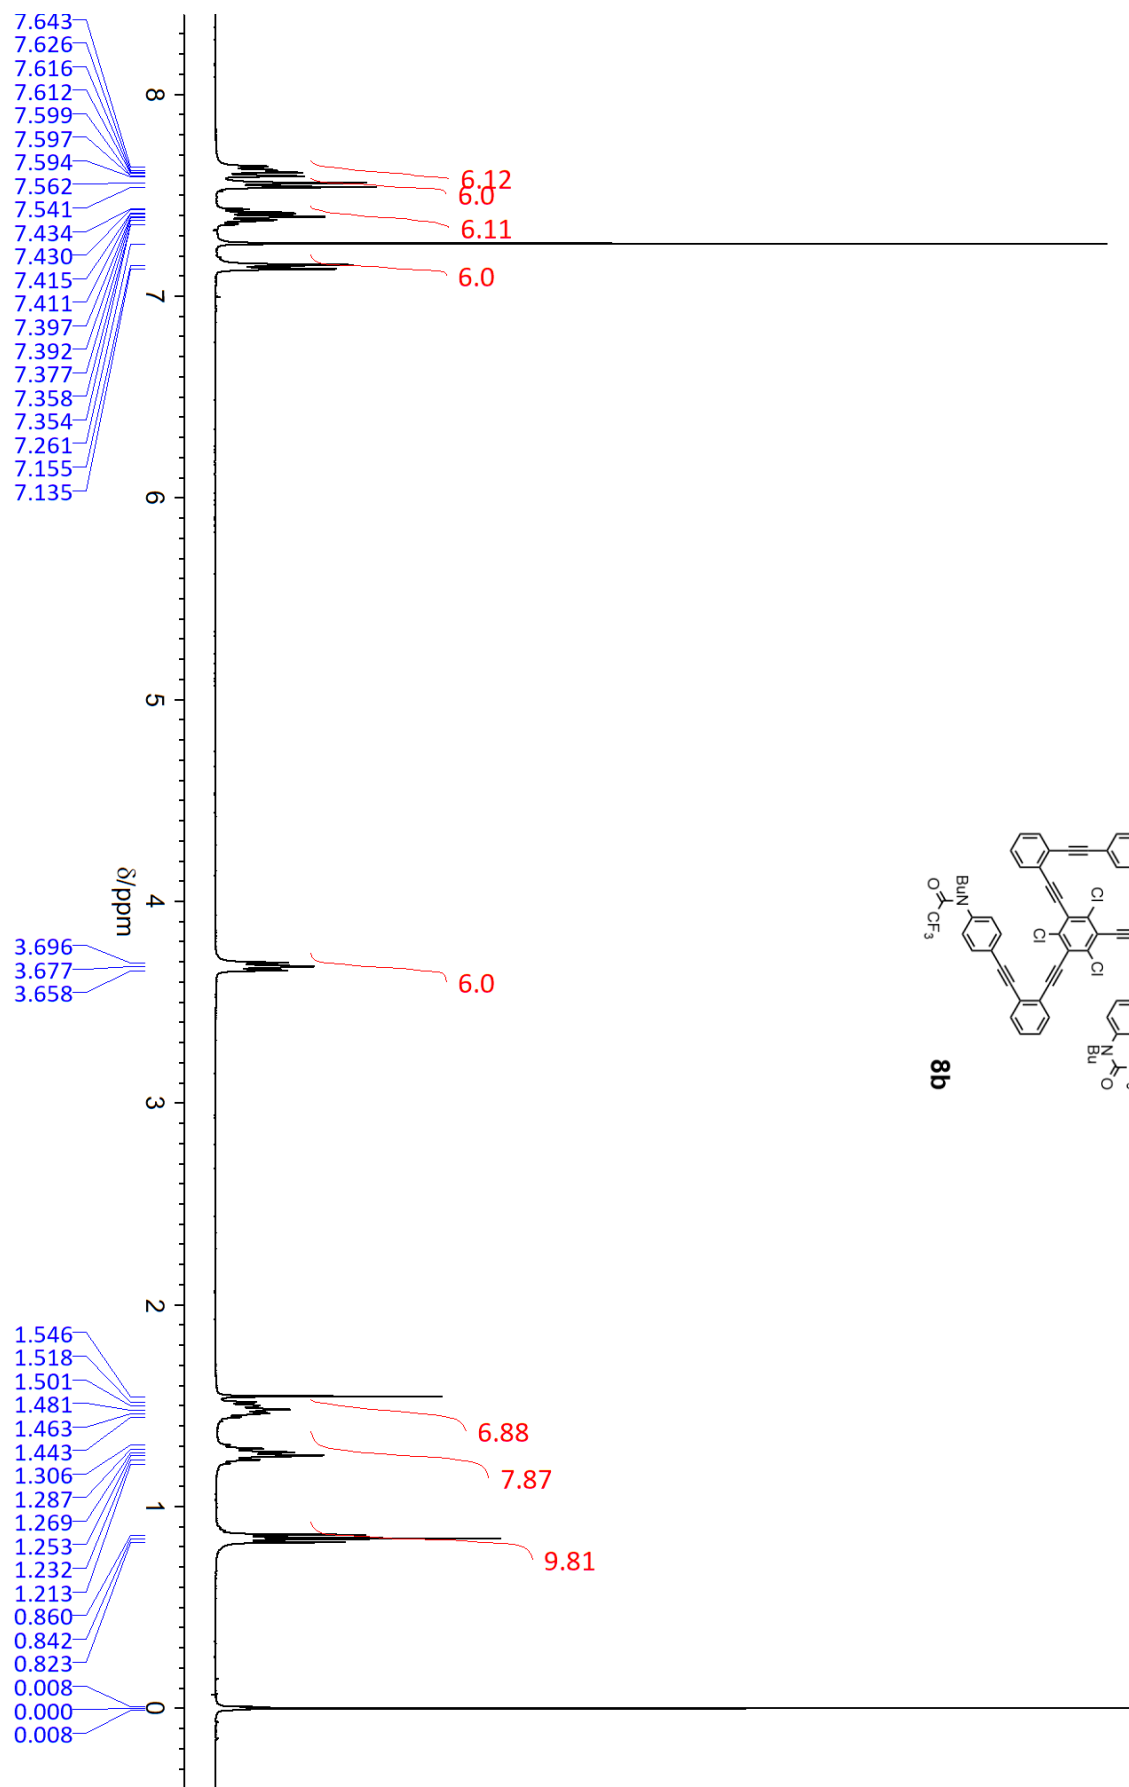

$^{13}\text{C}$  NMR spectrum (100 MHz) of **8b**, cont. residual hexane, measured in chloroform-*d* at room temperature.

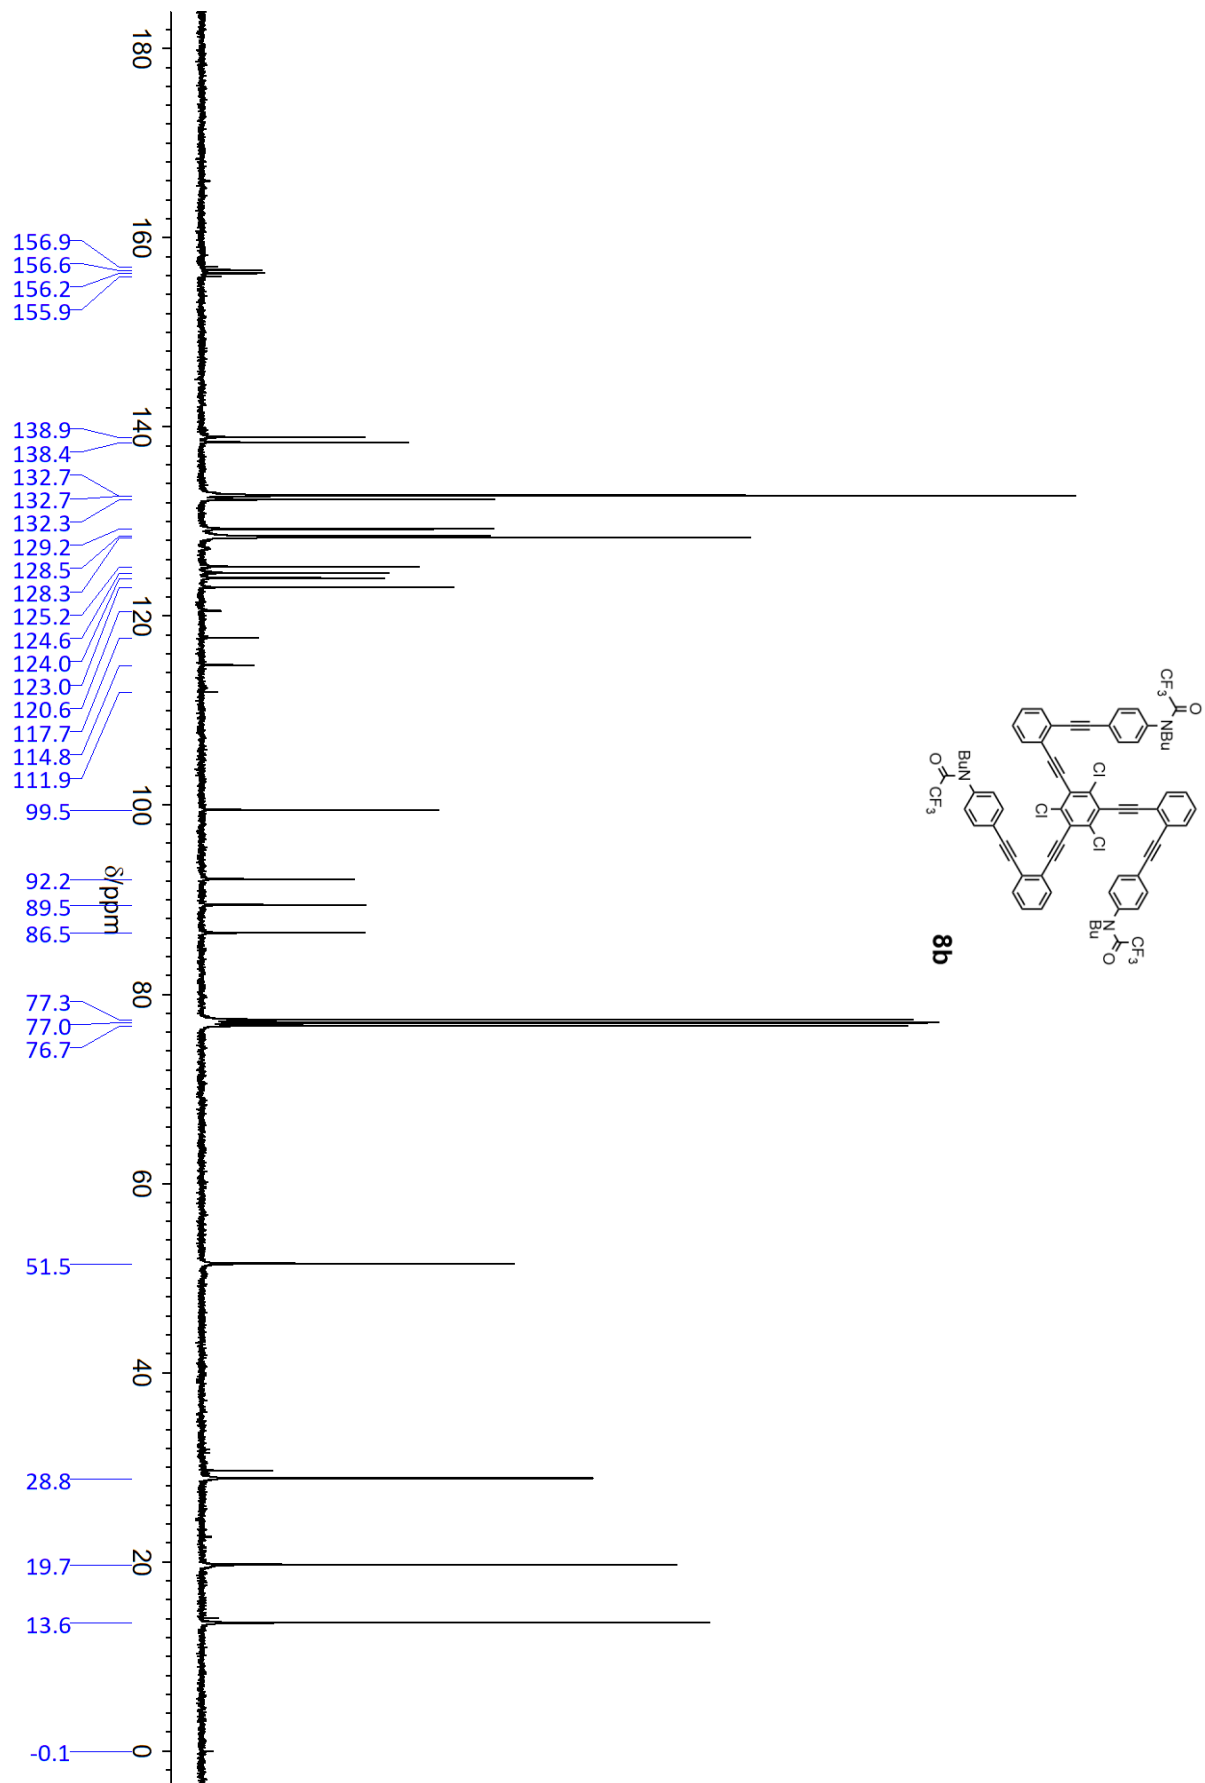

<sup>1</sup>H NMR spectrum (400 MHz) of **9a**, cont. residual hexane, measured in chloroform-*d* at room temperature.

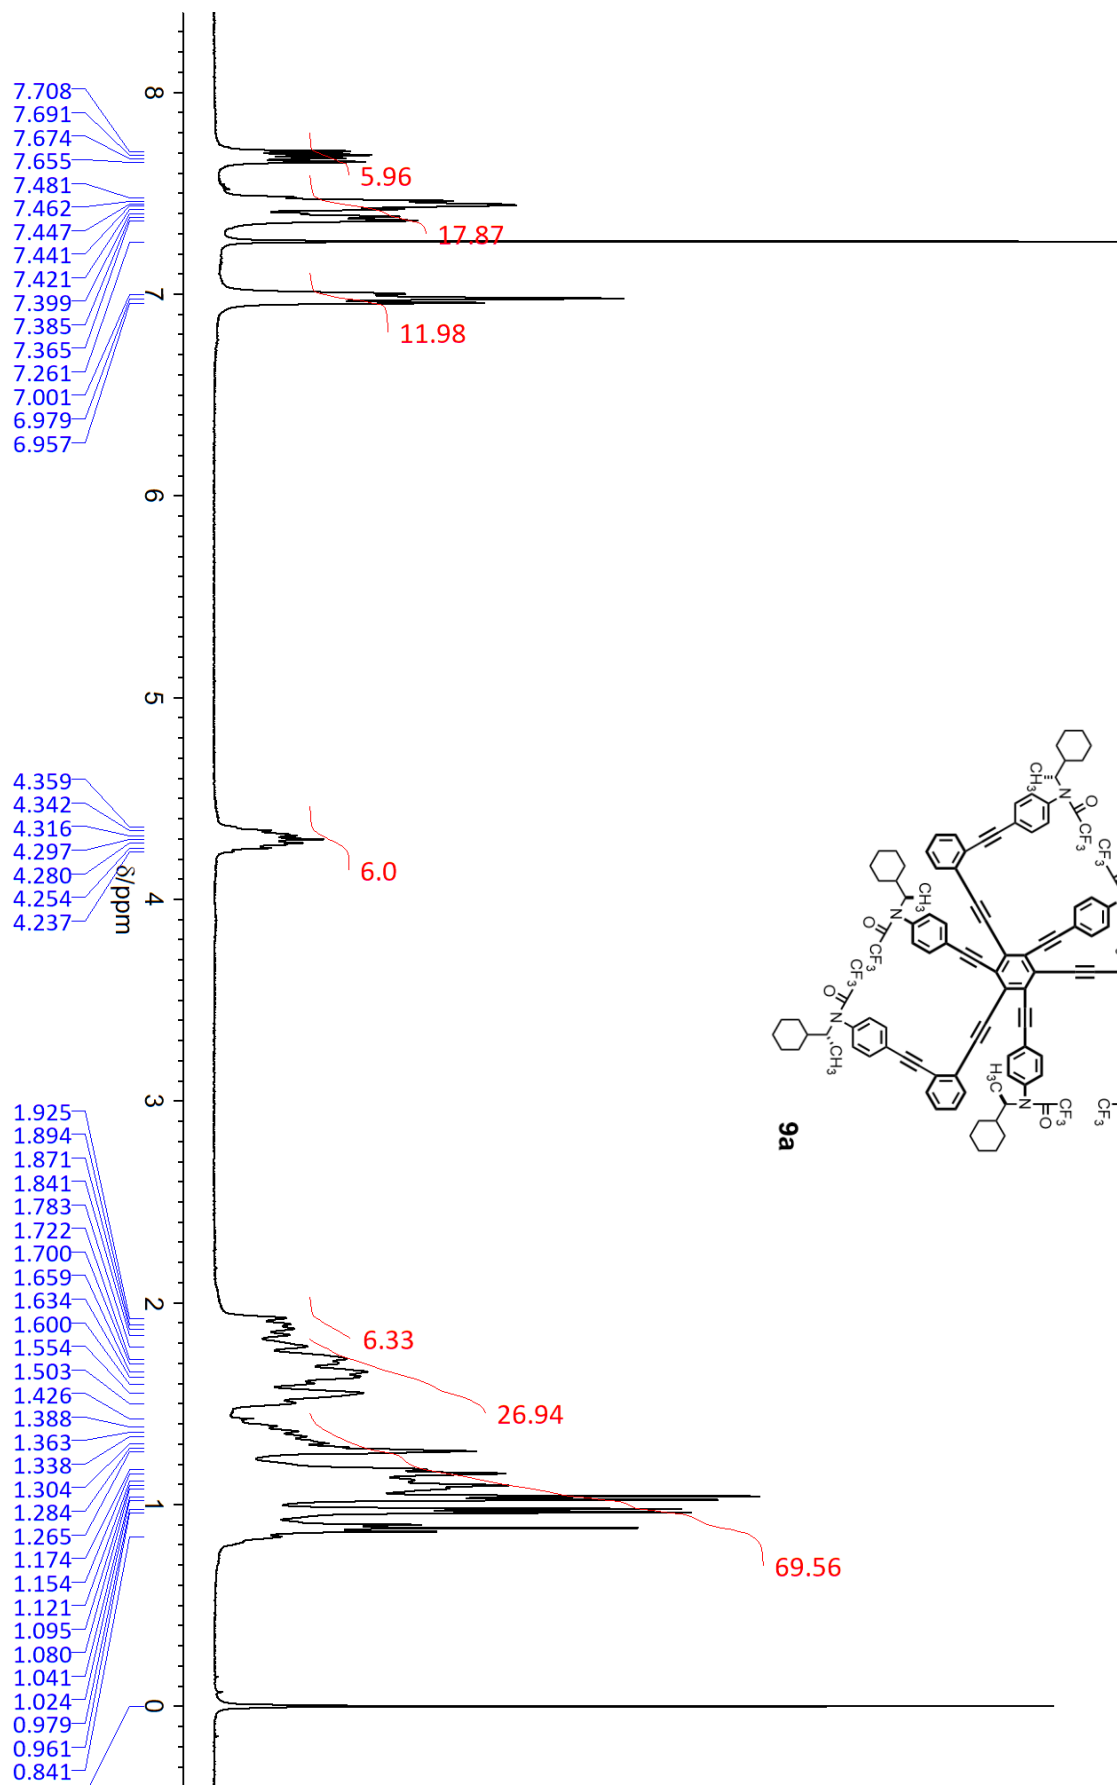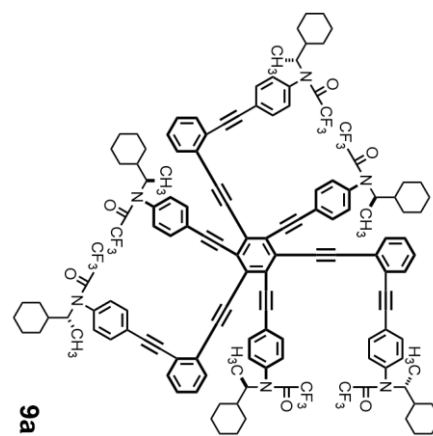

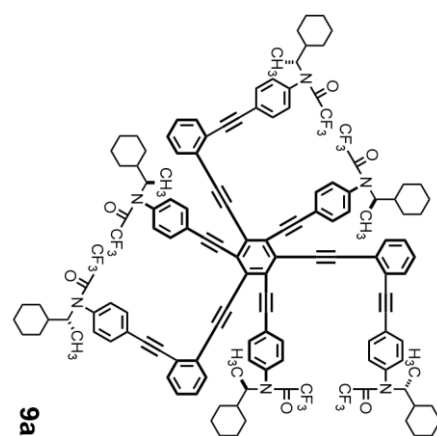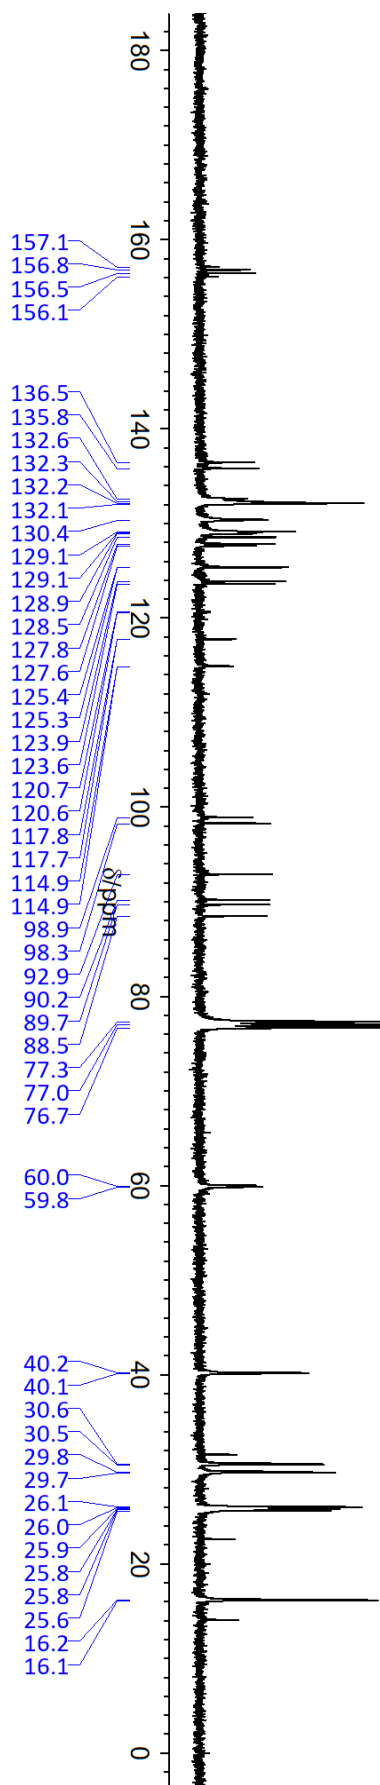

$^{13}\text{C}$  NMR spectrum (100 MHz) of **9a**, cont. residual hexane, measured in chloroform-*d* at room temperature.



<sup>1</sup>H NMR spectrum (400 MHz) of **9b**, measured in chloroform-*d* at room temperature.

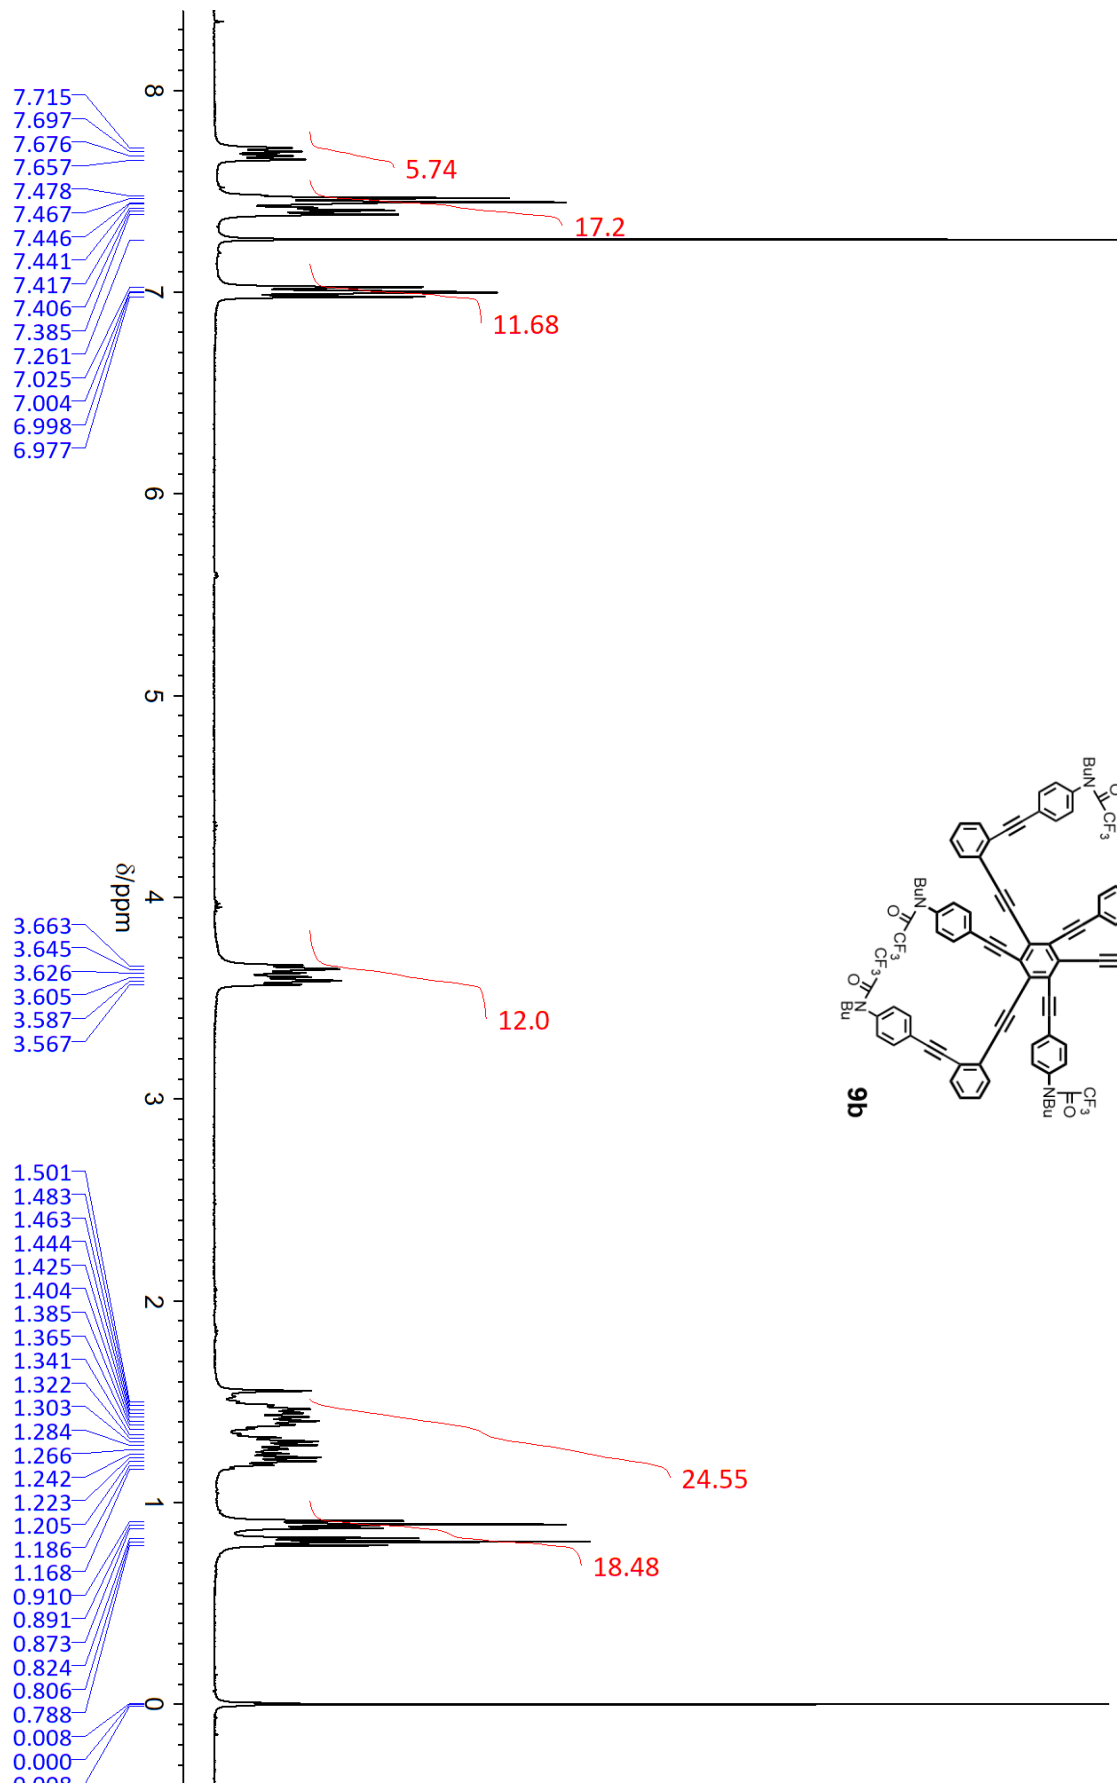

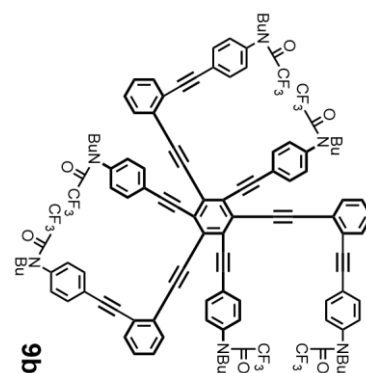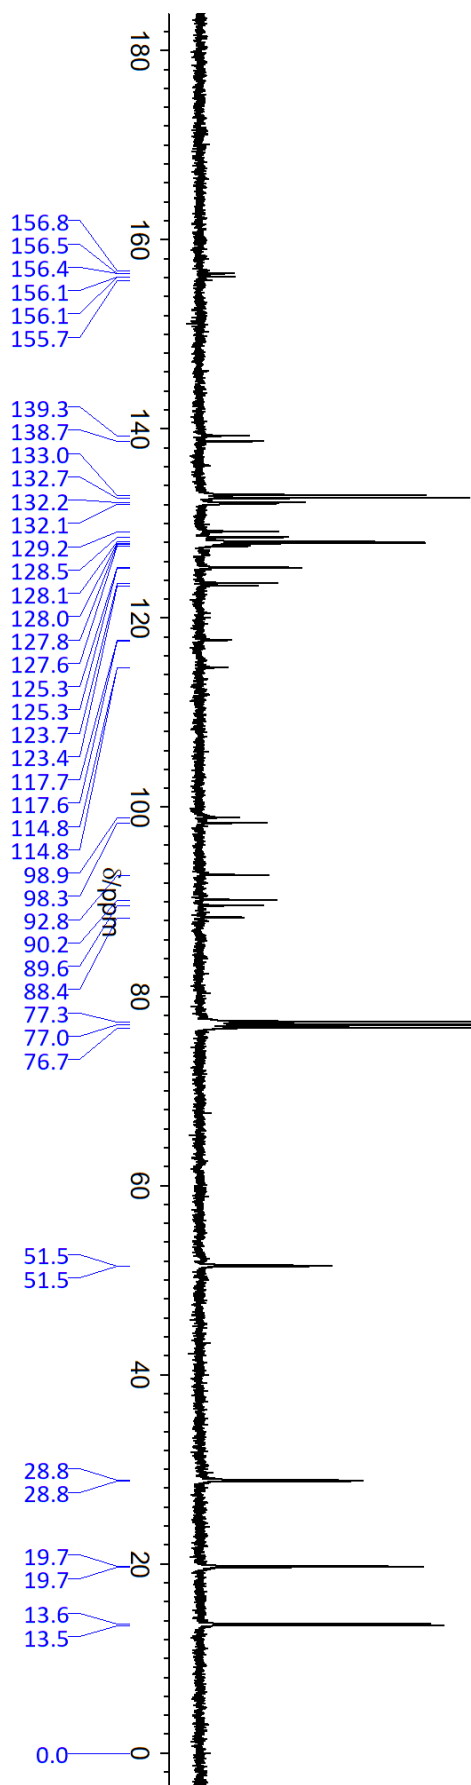

$^{13}\text{C}$  NMR spectrum (100 MHz) of **9b**, measured in chloroform-*d* at room temperature.

$^1\text{H}$  NMR spectrum (400 MHz) of **3a**, measured in chloroform-*d* at room temperature.

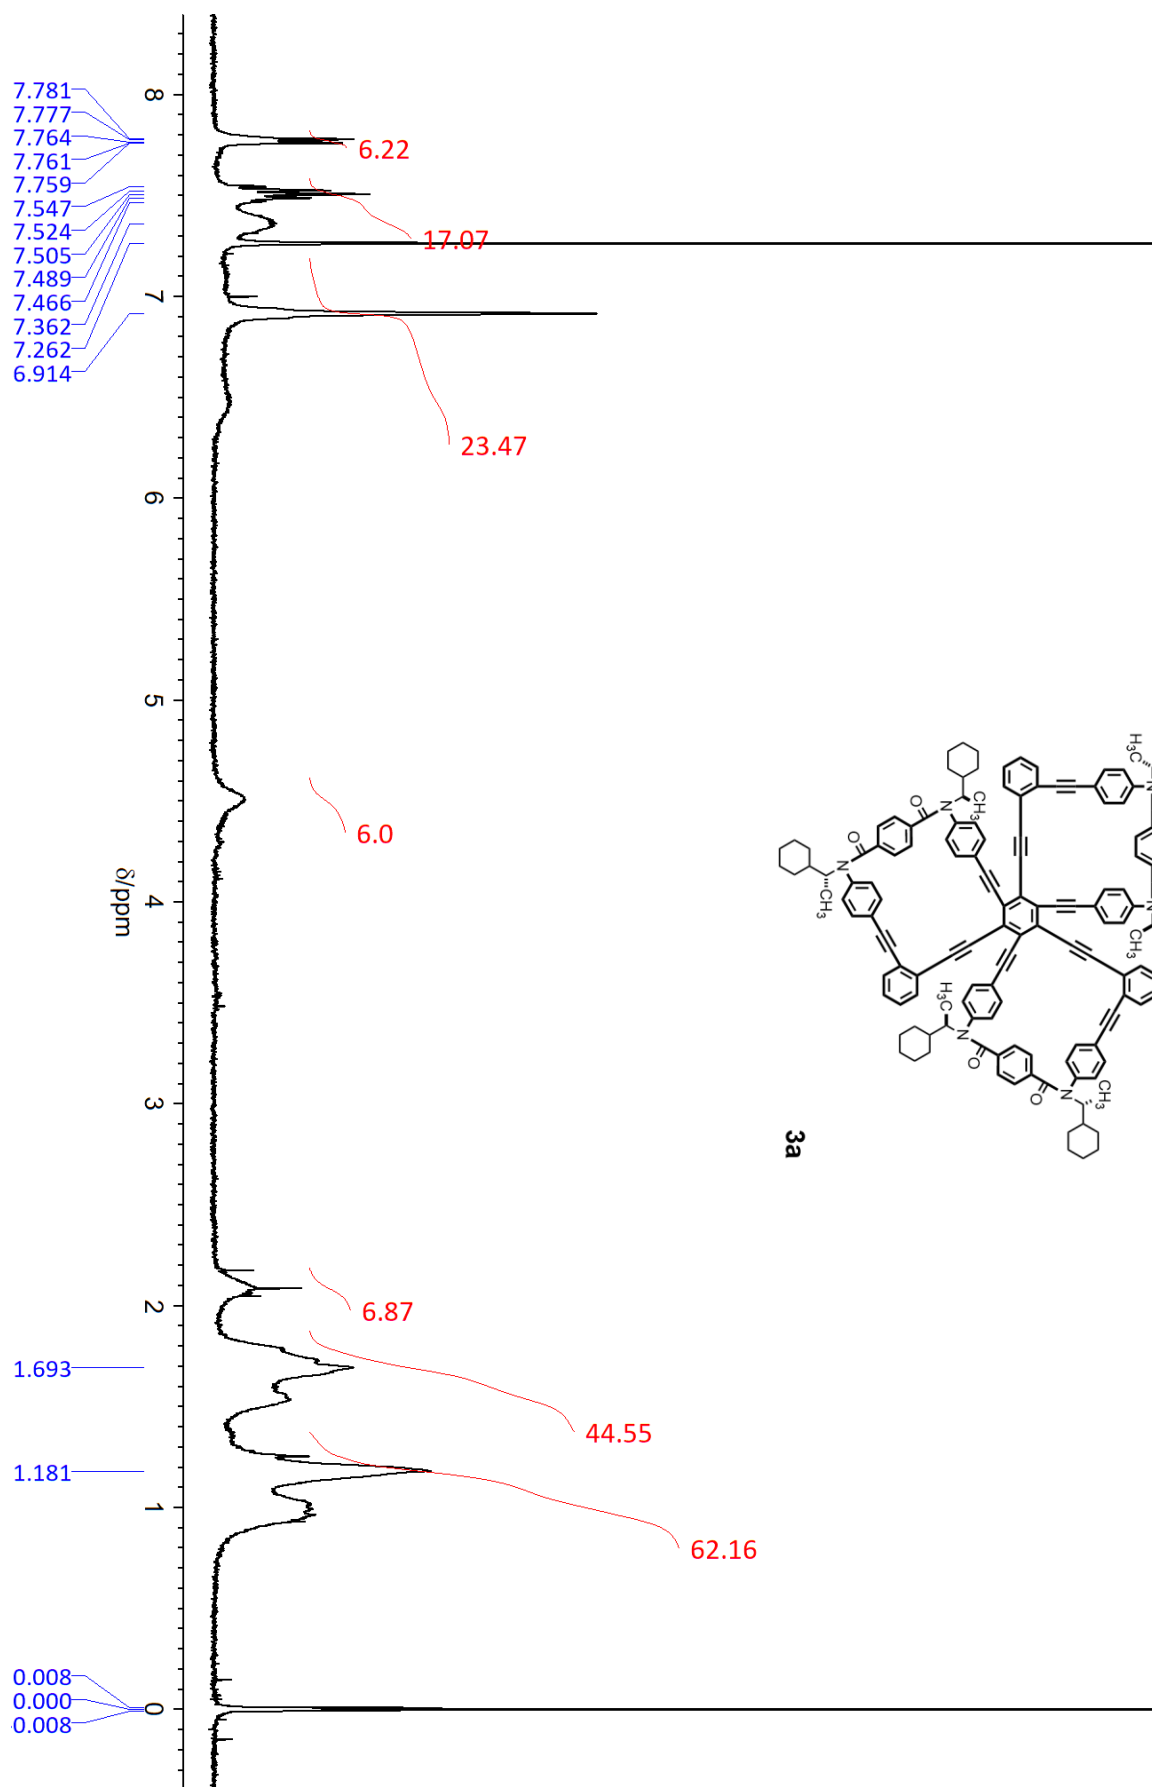

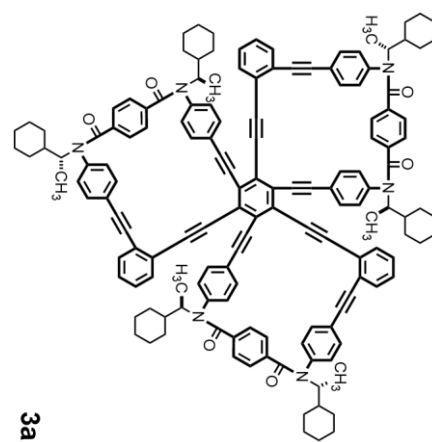

**3a**

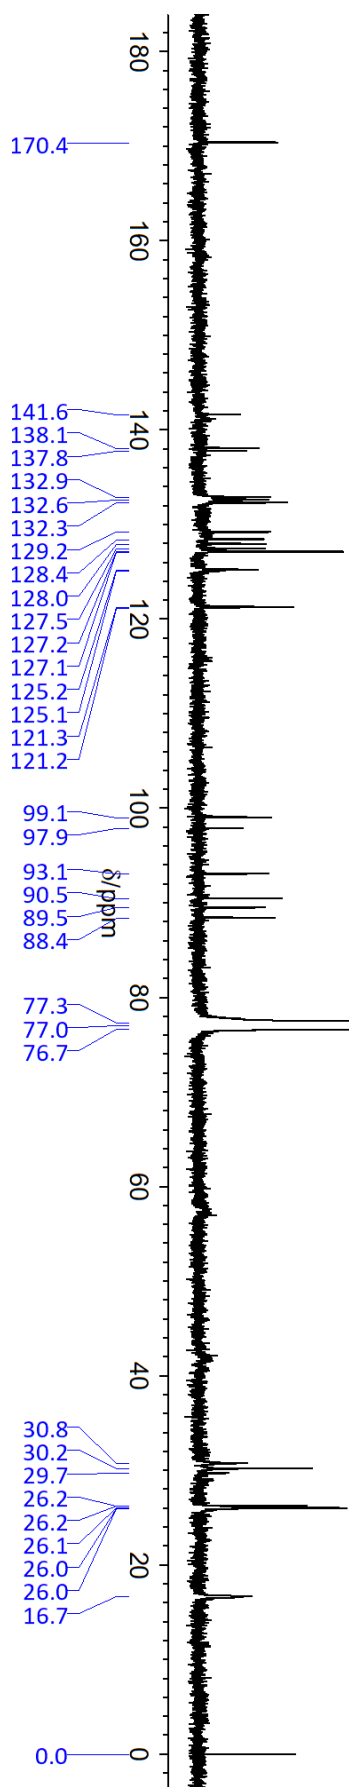

$^{13}\text{C}$  NMR spectrum (100 MHz) of **3a**, measured in chloroform-*d* at room temperature.

<sup>1</sup>H NMR spectrum (400 MHz) of **3b**, measured in chloroform-*d* at room temperature.

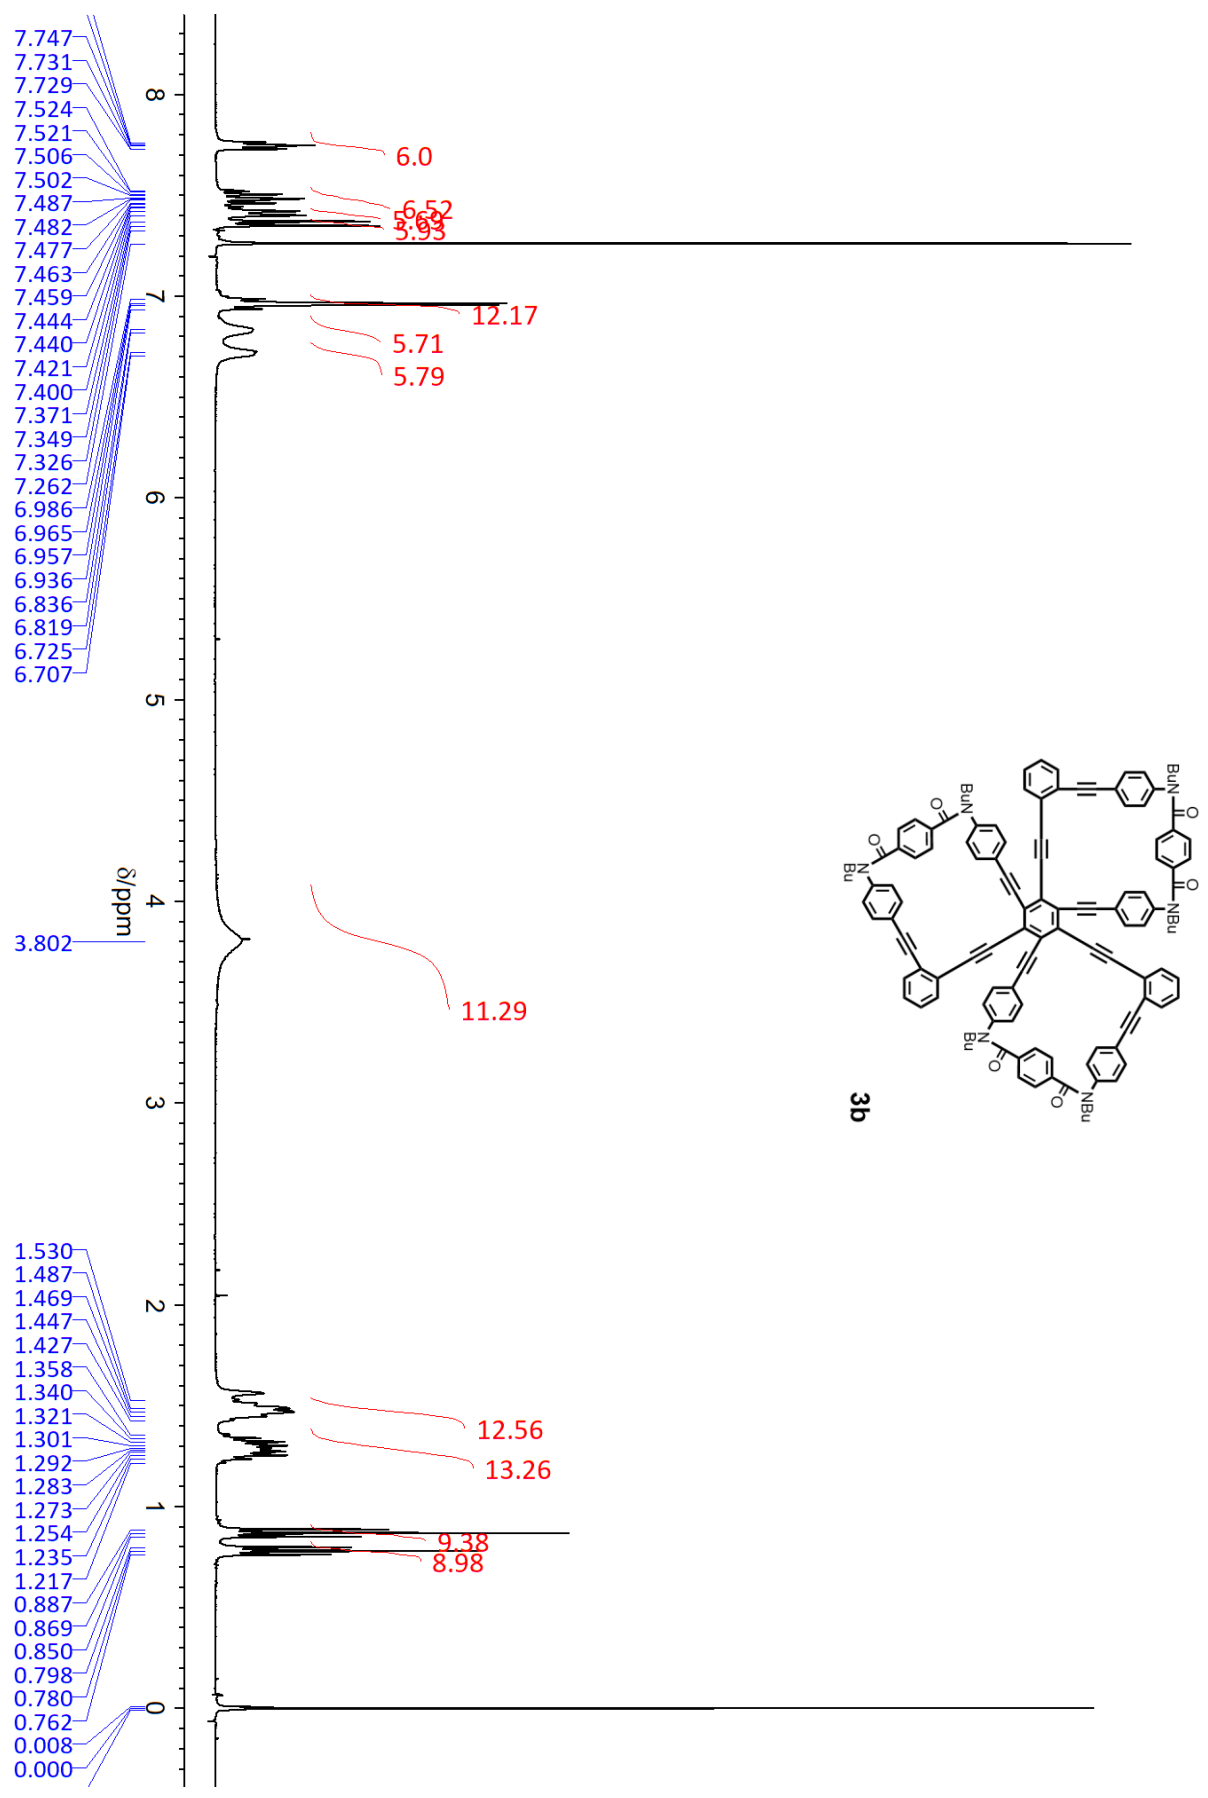

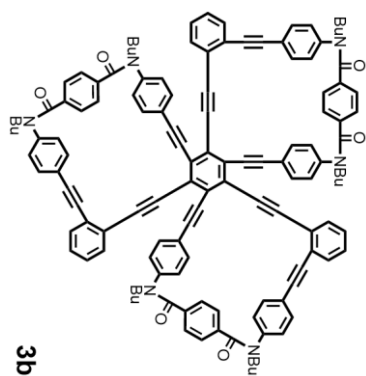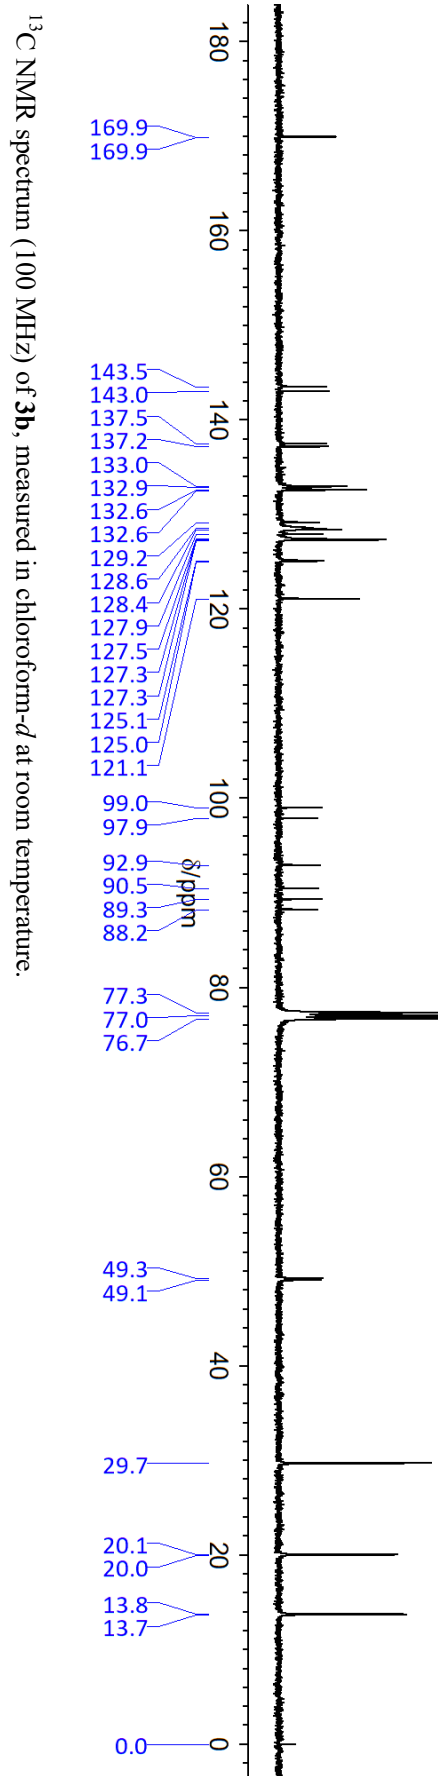

Data: common/Mar06:a80756-  
Sample: 2713 Kudo / n8  
Experiment Date/Time: 2017/03/06 17:08:11  
Average(MS[1] Time:0.31)

Instrument Configuration: FD7ローブ,JMS-T100GCV  
Ionization Mode: FD+  
Acquired m/z Range: 50.00..3200.00  
Detector Volt: 2300[V]

MS Tune Method Name: FD  
Agilent7890A Method Name: -

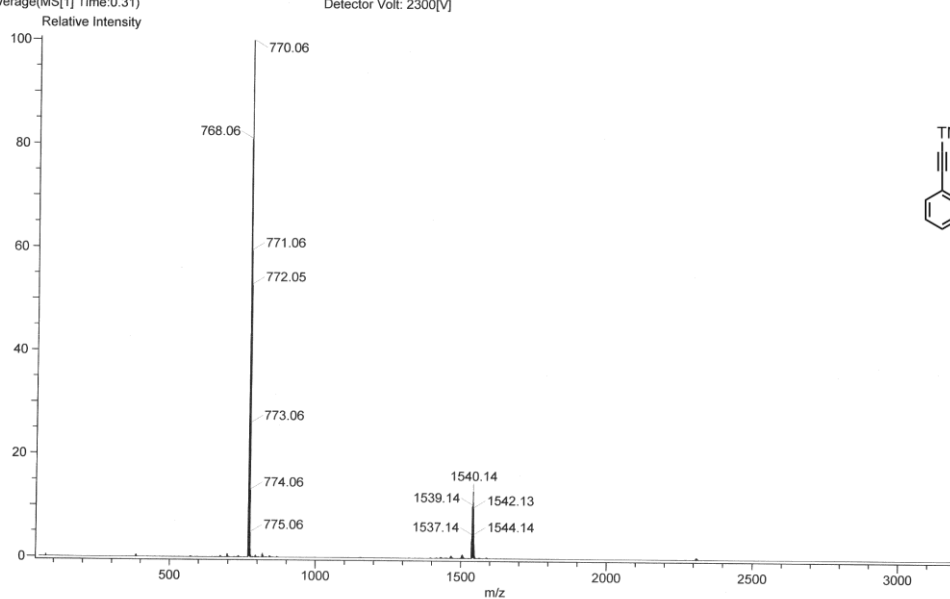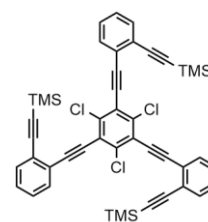

7

LR MS spectrum (FD) of 7.

Data: common/Mar06:a80757-  
Sample: 2713 Kudo / n9a  
Experiment Date/Time: 2017/03/06 17:13:53  
Average(MS[1] Time:0.47)

Instrument Configuration: FDフローブ,JMS-T100GCV  
Ionization Mode: FD+  
Acquired m/z Range: 50.00..3200.00  
Detector Volt: 2300[V]

MS Tune Method Name: FD  
Agilent7890A Method Name: -

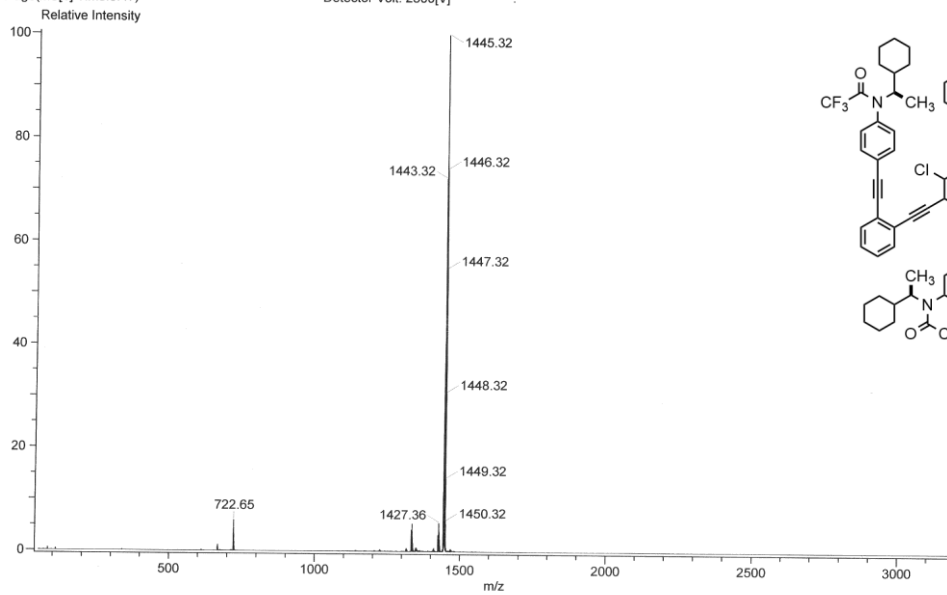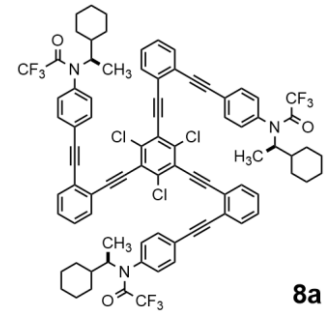

LR MS spectrum (FD) of **8a**.

Data: common/Mar06:a80758-  
Sample: 2713 Kudo / n9b  
Experiment Date/Time: 2017/03/06 17:21:25  
Average(MS[1] Time:0.45)

Instrument Configuration: FDフローブ,JMS-T100GCV  
Ionization Mode: FD+  
Acquired m/z Range: 50.00..3200.00  
Detector Volt: 2300[V]

MS Tune Method Name: FD  
Agilent7890A Method Name: -

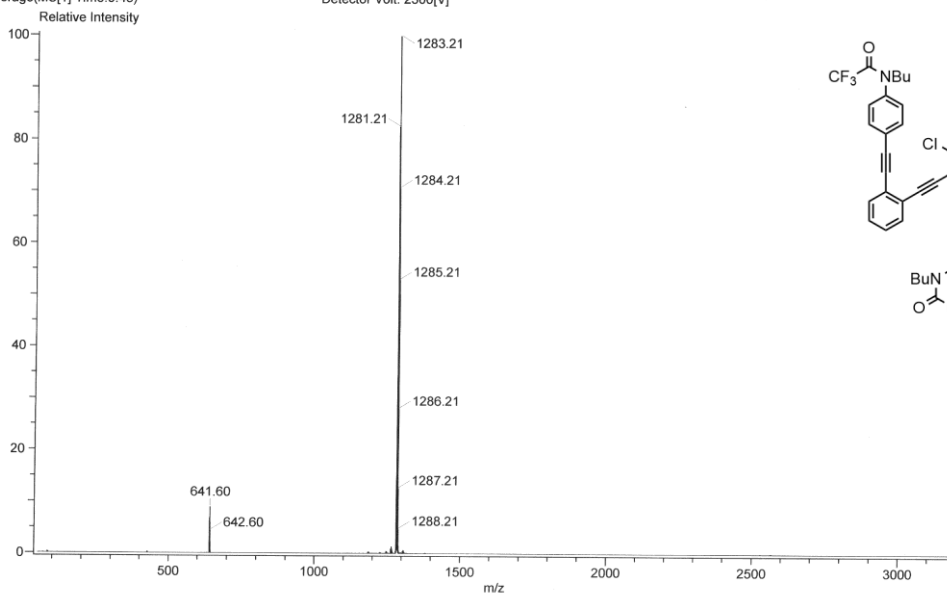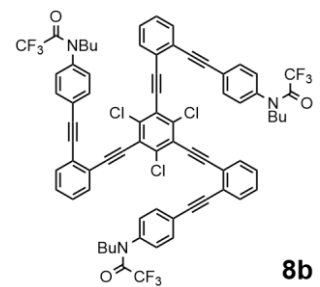

LR MS spectrum (FD) of **8b**.



Data: common/Mar06:a80759-  
Sample: 2713 Kudo / n10a  
Experiment Date/Time: 2017/03/06 17:25:45  
Average(MS[1] Time:0.44..0.46)

Instrument Configuration: FDプローブ,JMS-T100GCV  
Ionization Mode: FD+  
Acquired m/z Range: 50.00..3200.00  
Detector Volt: 2300[V]

MS Tune Method Name: FD  
Agilent7890A Method Name: -

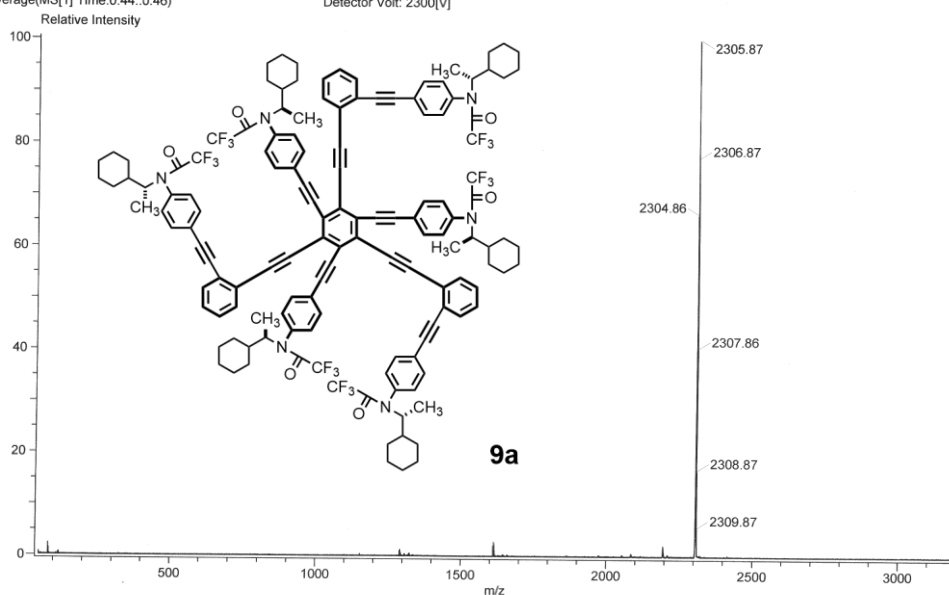

LR MS spectrum (FD) of **9a**.

Data: common/Mar06:a80760-  
Sample: 2713 Kudo / n10b  
Experiment Date/Time: 2017/03/06 17:29:33  
Average(MS[1] Time:0.47)

Instrument Configuration: FDプローブ,JMS-T100GCV  
Ionization Mode: FD+  
Acquired m/z Range: 50.00..3200.00  
Detector Volt: 2300[V]

MS Tune Method Name: FD  
Agilent7890A Method Name: -

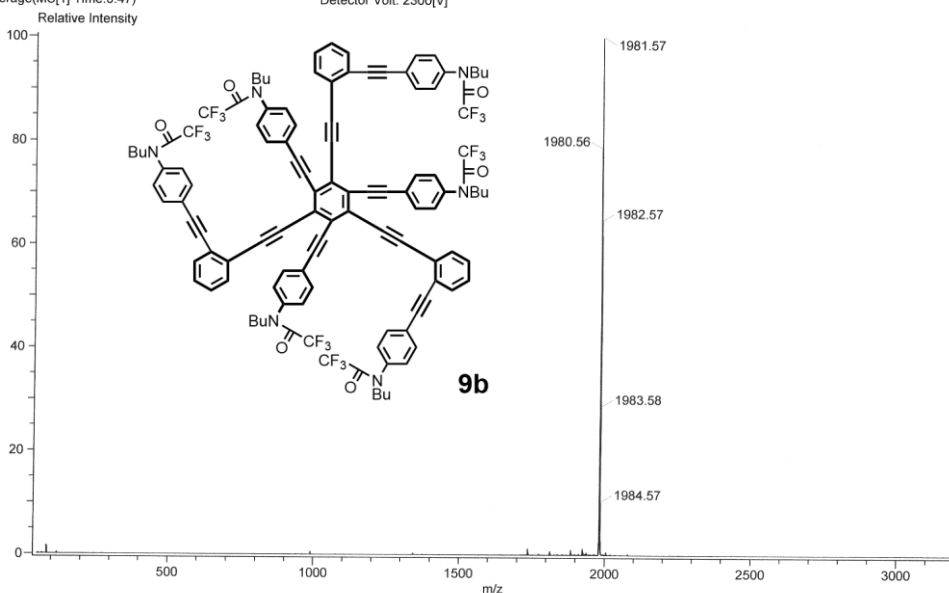

LR MS spectrum (FD) of **9b**.

Data: common/Mar10:a80773-3  
Sample: 2713 Kudo / n3a-1  
Experiment Date/Time: 2017/03/10 11:16:58  
Average(MS[1] Time:0.47..0.50)

Instrument Configuration: FDプローブ,JMS-T100GCV  
Ionization Mode: FD+  
Acquired m/z Range: 50.00..3200.00  
Detector Volt: 2500[V]

MS Tune Method Name: FD  
Agilent7890A Method Name: -

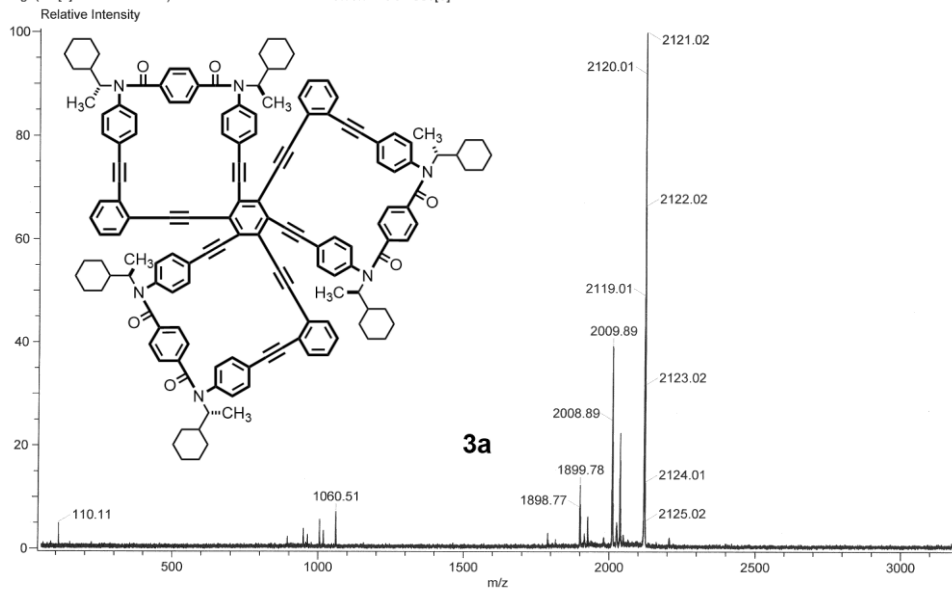

LR MS spectrum (FD) of **3a**.

Data: common/Mar06:a80761-  
Sample: 2713 Kudo / n3b  
Experiment Date/Time: 2017/03/06 17:33:19  
Average(MS[1] Time:0.52)

Instrument Configuration: FDプローブ,JMS-T100GCV  
Ionization Mode: FD+  
Acquired m/z Range: 50.00..3200.00  
Detector Volt: 2300[V]

MS Tune Method Name: FD  
Agilent7890A Method Name: -

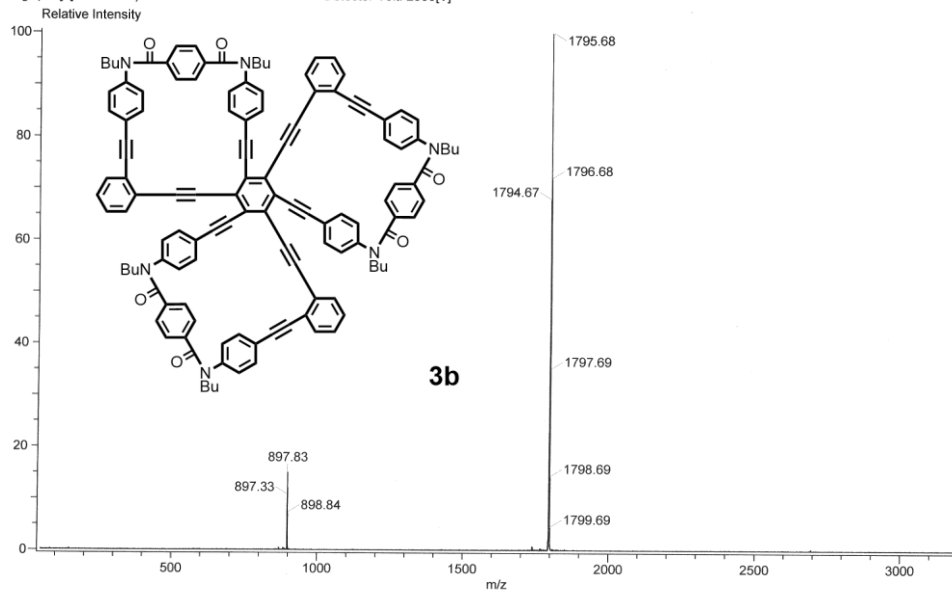

LR MS spectrum (FD) of **3b**.
